## 1 *Original article*

### 2 **Difference in presentation, outcomes, and hospital epidemiologic trend of COVID-19** 3 **among first, second, and third waves in Dhaka Medical College**

#### 4 **Authors:**

- 5 1. **Dr. Reaz Mahmud FCPS, MD**, Assistant Professor, Department of Neurology, Dhaka  
6 Medical College. Dhaka, Bangladesh. Phone-+8801912270803. [E-mail-](mailto:reazdmc22@yahoo.com)  
7 [reazdmc22@yahoo.com](mailto:reazdmc22@yahoo.com) and [rmahmudneuro@dmc.gov.bd](mailto:rmahmudneuro@dmc.gov.bd). ORCID ID-0000-0002-9427-  
8 1746.
- 9 2. **Dr. Md. Ashikul Islam, MD**, Indoor Medical Officer, National Institute of  
10 neurosciences and Hospital. Dhaka, Bangladesh. phone: 01737104013, [mail-](mailto:ashikdmc62@gmail.com)  
11 [ashikdmc62@gmail.com](mailto:ashikdmc62@gmail.com), ORCID ID -0000-0001-8331-1362
- 12 3. **Dr. Md. Emdadul Haque, MD**, Medical officer, Department of Neurology, Dhaka  
13 Medical College. Dhaka, Bangladesh. phone: 0714560256, [mail-](mailto:dr.emdadmithu@gmail.com)  
14 [dr.emdadmithu@gmail.com](mailto:dr.emdadmithu@gmail.com), ORCID ID 0000-0001-6870-6075
- 15 4. **Dr. Md. Dewan Azmal Hussain**, Assistant professor, National Institute of Chest  
16 diseases and Hospital, Phone: +8801819449812, Mail: [azmal.dr@gmail.com](mailto:azmal.dr@gmail.com)
- 17 5. **Dr. Mohammad Rafiqul Islam**, Associate professor, Department of Medicine, shaheed  
18 Suhrawardy Medical college. Phone-+8801624413595, Mail: [dr Rafiq73@yahoo.com](mailto:dr Rafiq73@yahoo.com).
- 19 6. **Dr. Farhana Binte Monayem, MBBS**, Medical officer, Sarkari karmachari Hospital.  
20 Dhaka, Bangladesh. Phone-+8801920155971. [Mail-farhanabintemonayem@gmail.com](mailto:Mail-farhanabintemonayem@gmail.com).  
21 ORCID ID-0000-0001-5023-0638.
- 22 7. **Dr. Mostofa Kamal, MD**, Assistant professor, Department of Medicine, Dhaka Medical  
23 College. Phone-+8801711582960, mail- [mkamal052@gmail.com](mailto:mkamal052@gmail.com)

- 24 8. **Dr. Hashmi Sina MRCP, MD**, Assistant professor, Department of Neurology, Dhaka  
25 Medical College. Dhaka, Bangladesh. Phone-+88017189675269, E-mail:  
26 hashmi.sina49@gmail.com
- 27 9. **Dr. Mohammad Fakhrul Islam, MD**, Assistant professor, Department of Neurology,  
28 Dhaka Medical College. Dhaka, Bangladesh. Phone-+88001937859810, mail-  
29 fakhrulislam.work@gmail.com.
- 30 10. **Dr. Ponkaj Kanti Datta**, Assistant professor, Department of Medicine, Dhaka Medical  
31 College, Dhaka, Bangladesh. Phone number: +8801711069701. Mail-  
32 [ponkajdatta@yahoo.com](mailto:ponkajdatta@yahoo.com). ORCID ID: [0000-0002-4508-4549](https://orcid.org/0000-0002-4508-4549)
- 33 11. **Dr. S.K. Jakaria Been Sayeed, MRCP**, Indoor Medical Officer, National Institute of  
34 neurosciences and Hospital. Dhaka, Bangladesh Phone- +8801783335147. Mail-  
35 [skjakaria1@gmail.com](mailto:skjakaria1@gmail.com). ORCID ID-0000-0003-1173-4248.
- 36 12. **Dr. Sabbir Ahmed Dhali, MD**, Registrar, Department of Neurology, Dhaka Medical  
37 College. Dhaka, Bangladesh. Phone-+8801720015583. Mail-[dr.sabbirdhali@gmail.com](mailto:dr.sabbirdhali@gmail.com).
- 38 13. **Dr. Khairul Islam, FCPS**. Junior consultant, Department of Medicine, Dhaka Medical  
39 College, Dhaka, Bangladesh. phone-+8801717696207. Mail-  
40 [khairul0696207@gmail.com](mailto:khairul0696207@gmail.com), ORCHID: 00 00000188716270.
- 41 14. **Dr. Rifat Hossain Ratul**, Medical Officer, COVID-19 post-acute care and follow-up  
42 clinic, Dhaka Medical College. Phone:01631907154, Mail: [dr.ratulrifat@gmail.com](mailto:dr.ratulrifat@gmail.com).
- 43 15. **Dr. SK Md. Rubaed Hossain**, Research Assistant, Stroke registry, Department of  
44 Neurology, Dhaka Medical College. Dhaka, Bangladesh, Phone: 01680888637, **Mail:**  
45 [dr.rubaed94@gmail.com](mailto:dr.rubaed94@gmail.com).

- 46 16. **Habib Naziat Prince**, MSC, Research Assistant, North South University, **phone:**  
47 +8801647237397. Mail- [habib.52statru@gmail.com](mailto:habib.52statru@gmail.com)
- 48 17. **Dr. Ahmed Hossain Chowdhury**, MD, Associate Professor, Department of Neurology,  
49 Dhaka Medical College. Dhaka, Bangladesh. Cell no: +88001712257206. [Mail:](mailto:ahmedssmc17@yahoo.com)  
50 [ahmedssmc17@yahoo.com](mailto:ahmedssmc17@yahoo.com).
- 51 18. **Dr. Kazi Gias Uddin Ahmed**, Associate Professor and Head, Department of Neurology,  
52 Dhaka Medical College. Dhaka, Bangladesh. Phone-01611272277 mail-  
53 [kazi17k43@gmail.com](mailto:kazi17k43@gmail.com). [ORCID ID-0000-0002-0163-8271](https://orcid.org/0000-0002-0163-8271)
- 54 19. **Dr. Md.Titu Miah**, Principal and Professor of Medicine, Department of Medicine,  
55 Dhaka Medical College, Dhaka, Bangladesh. **Mobile:** +8801711591770. Mail:  
56 [titum21@gmail.com](mailto:titum21@gmail.com)
- 57 20. **Dr. Md. Mujibur Rahman FCPS, MD, FACP** Professor, Department of Medicine,  
58 Bangabandhu Sheikh Mujib Medical University, Dhaka. Bangladesh Phone-  
59 01711525406 [Mail-mmrahman61@gmail.com](mailto:mmrahman61@gmail.com). ORCID Identifier: 0000-0002-4381-  
60 1511.

61 **Data availability statement:** The data will be within the paper and uploaded as supplementary  
62 file.

63 **A funding statement:** This research received grant from Director General of Health Services,  
64 Government of the peoples' republic of Bangladesh.

65 **Conflict of interest disclosure:** The authors declare that there is no conflict of interest.

66 **Ethics approval statement:** The Institutional Ethical Committee of Dhaka Medical College  
67 approved the study (ERC-DMC/ECC/2021/55).

68 **Patient consent statement:** As we mainly reviewed hospital data, there was no scope for written  
69 consent. We took verbal permission from the patient for post-covid follow-up.

70 **Permission to reproduce material from other sources:** Not applicable

71 **Clinical trial registration:** Not applicable

72

73

74 **Corresponding Author:**

75 **Dr. Reaz Mahmud,**

76 Assistant Professor, Department of Neurology, Dhaka Medical College. Dhaka, Bangladesh.

77 Phone-+8801912270803.

78 [E-mail-reazdmc22@yahoo.com](mailto:reazdmc22@yahoo.com). [rmahmudneuro@dmc.gov.bd](mailto:rmahmudneuro@dmc.gov.bd).

79 ORCID ID-0000-0002-9427-1746

80

81

82

83

84

85

86

87

88

89

90

91

92

93 **Difference in presentation, outcomes, and hospital epidemiologic trend of COVID-19**

94 **among first, second, and third waves in Dhaka Medical College**

95 **Abstract:**

96 **Background**

97 This study aimed to examine the differences in epidemiologic and disease aspects among  
98 patients with COVID-19

99 **Methods:**

100 We reviewed the hospital records between April 2020 and September 2021 and followed up on  
101 the patients for post-COVID complications.

102 **Findings:**

103 Older adult patients were predominantly affected during the first and second waves, followed by  
104 middle-aged patients. Men were predominantly admitted, considering the three waves; although  
105 more women were admitted in the second wave. Cough was more common in the second and  
106 third waves than in the first wave 522 (59.7%). Respiratory distress was the most common in the  
107 third wave, 251(67.1%), and least common in the first wave 403 (46.1%). Anosmia was more  
108 common in the third wave 116 (31.2%). In the third wave, patients presenting in a critical state  
109 23 (6.2%) and severe disease 152 (40.8%) were more common. The hospital admission median  
110 (IQR) was longer in the first wave, 12 (8–20), than in other waves. More patients were admitted  
111 in the first wave (52%) than in the other waves, and patients received more oxygen in the third  
112 wave (75%) than in the other waves. Death occurred more commonly in the first wave (51%)  
113 than in the other waves. Patients were investigated more commonly in the first and third waves

114 than in the second wave. The positivity rate was high in the third wave (22.8%) than in other  
115 waves. In the third wave, the positivity rate was higher in women (24.3%) than in men. Post-  
116 covid cough increased in the second wave and fatigue was higher in the third wave than in other  
117 waves. Tiredness and memory loss was greater during the second wave than in other waves.

### 118 **Conclusion:**

119 This study revealed that the presenting symptoms, outcomes, and epidemiologic trends differed  
120 during the COVID-19 waves.

## 121 **Introduction**

122 On December 31 World Health Organization (WHO) formally reported a case of atypical  
123 pneumonia in Wuhan City, China [1], which was later named coronavirus disease-19 (COVID-  
124 19) caused by severe acute respiratory syndrome coronavirus 2 (SARS-CoV-2) [2]. On March  
125 11, 2020, WHO declared the novel coronavirus (COVID-19) outbreak a global pandemic [3].

126 The WHO classified the phases of the pandemic as phases 1–3(predominantly animal infection,  
127 few human infections), phase 4(sustained human-to-human infection), phases 5 and 6  
128 (widespread human infection), post-peak (possibility of recurrent events), and post-pandemic  
129 (disease activity at seasonal level) [4]. Most of the worst pandemics lasted for several years [5].

130 After studying the transmission dynamics of SARS-CoV-2, researchers postulated that it would  
131 reach long-term circulation within the next five years [6]. Experience in the last 2 years has  
132 revealed that resurgence as “waves” is common [4], and the overall pattern of the coronavirus  
133 pandemic has been a series of increased COVID-19 waves: which gradually declines. Several  
134 outbreaks of illnesses have occurred in various parts of the world. Europe entered its third phase  
135 in March 2021 [7], and the United States is likely to experience the 4th wave [8]. The reason for

136 the seasonal variation in transmission, duration of immunity, degree of cross-immunity between  
137 SARS-CoV-2 and other coronaviruses, intensity and timing of control measures [7], and not the  
138 least viral mutation can all explain the wave and gradual decline of cases (waves of the disease).  
139 [10]. SARS-CoV-2 has mutated at a pace of about 1–2 mutations per month throughout the  
140 current global crisis [11]. A variant of SARS-CoV-2 with the *D614G* mutation emerged in China  
141 in late January and early February 2020 and immediately became the dominant form of the virus  
142 circulating globally [10]. Subsequently, several mutations were recognized as mutations of  
143 concern, naming the UK variant known as 501Y. V1, VOC 202012/01, and B.1.1.7, a South  
144 African variant known as the 501Y. V2, or B.1.351, a Brazilian variant known as 501Y. V3 or  
145 P.1 lineage [11, 12, 13], and the Indian variant B.1.617 (double mutant) [14]. The Indian variant  
146 gave rise to India's second wave and stressed its health system. In terms of test positivity rates  
147 (TPRs) and case fatality rates (CFRs), the epidemiologic characteristics seem to differ from those  
148 of the first wave [15]. Bangladesh reported the peak of the second wave in late February 2021  
149 and the third wave in June 2021 [16]. In the second wave, death rate increased among the young  
150 [17]. The African variant was responsible for more than 80% of the second wave, while the delta  
151 variant was responsible for 78% of the third wave [17,18]. Preliminary reports of various SARS-  
152 CoV-2 mutant strains show transmissibility, severity, and case mortality diversity. The initial  
153 study about the African variant reported no significant correlation between severe disease and  
154 outcomes. However, higher transmissibility is possible. The mutant virus behavior in  
155 Bangladeshi populations remains largely unknown.

156 Therefore, this study aimed to systematically and scientifically observe the difference in the  
157 presentation and outcome of patients with COVID-19 between the first, second, and third waves.

158 Additionally, we examined the positivity rate, hospital admission rate, and death rate in  
159 outpatient department patients.

## 160 **Materials and Methods**

161 This study aimed to examine differences in the epidemiology of COVID-19 in the first, second,  
162 and third waves. We aimed to find if there were any variations in the symptoms, disease severity,  
163 case fatality, length of hospital stay, frequency of patients requiring oxygen therapy, and referrals  
164 to the intensive care unit (ICU). We reviewed the outpatient data for clinic attendance, hospital  
165 admission rate, and death in the outpatient department. We examined the virology laboratory  
166 data to observe differences in the positivity rate, number of tests, and age and sex. We reviewed  
167 inpatient hospital data for rates of hospital admission and death. We found differences in  
168 complications of COVID-19 in patients followed up for at least 6 months after hospital discharge  
169 during the first, second, and third waves of COVID-19.

### 170 **Study area and period**

171 The study was conducted at Dhaka Medical College Hospital between January 01, 2021, and  
172 June 20, 2022.

### 173 **Study design**

174 We conducted a cross-sectional study and a review of the hospital records. We reviewed the  
175 hospital records of outpatients, inpatients, and virology departments. We examined the patients'  
176 medical. Some patients were followed up for at least 6 months after discharge for post-COVID-  
177 19 complications. The telephone interviews followed pre-specified telephone interview  
178 guidelines.



## 179 **Source population**

180 The Dhaka Medical College Hospital inpatient were the source population.

## 181 **Study population**

182 The study population included inpatients and patients who called back at least 6 months after  
183 follow-up.

## 184 **Eligibility criteria**

185 The study included patients' records, containing important demographics such as age, sex, area  
186 of residence, telephone number, complete treatment sheet, admission and discharge date, and at  
187 least a brief history. Patients more than 18 years of age, with RT-PCR positive test results  
188 irrespective of the severity of the disease admitted between April 2020 and September 2022 were  
189 included in this study for analysis and follow-up.

## 190 **Sample size determination**

191 The sample size was calculated using the formula below, and the hypothesis was that there was  
192 no variation in presentation between the COVID-19 waves in Bangladesh during the pandemic:

$$193 \quad n = \frac{[Z_{\alpha}\sqrt{2p(1-p)} + Z_{\beta}\sqrt{p_1(1-p_1) + p_2(1-p_2)}]^2}{(p_1 - p_2)^2}$$

194 Here,  $Z_{\alpha}=1.96$  Z value of standard normal distribution at 95% confidence interval,  
195  $P_1$ =prevalence of severe infection in the first wave,  $P_2$ =Prevalence of severe disease in the  
196 second wave,  $RR=1.5$ [risk ratio],  $P_2=0.12$ ; in one study in Bangladesh, the prevalence of severe  
197 infection was 11.5% [19],  $P_1=RR \times p_2=0.18$ ,  $Z_{\beta}=0.84$  at 80% power,  $P = (p_1+p_2) \div 2=0.15$ . Thus,  
198 the estimated sample size was 240 for each wave.

## 199 **Sampling technique and procedure**

200 Cluster sampling methods were used. We compiled a list of all wards where patients with  
201 COVID-19 had been admitted. We selected one male ward and one female ward. We  
202 subsequently reviewed all records that met the inclusion and exclusion criteria. We selected post-  
203 COVID follow-up with non-random sampling methods.

## 204 **Study variables**

205 The variables included in the study were

206 **Demographic variable:** Age of the respondents in years and sex

207 **Presenting features of COVID-19:** Fever, cough, respiratory distress, sore throat, nausea,  
208 vomiting, diarrhea, and body ache.

209 **Investigations in COVID-19 state:** Total blood count, CRP, D-dimer, creatinine, and ferritin  
210 levels.

211 **COVID-19-severity:** COVID-19 positivity, symptoms in case of COVID-19 positivity  
212 (asymptomatic, mild, moderate, severe, or critical)

213 **Duration:** Duration between symptom onset and hospital admission, length of hospital stay.

214 **Post-COVID-19 conditions:** Fatigue, cough, respiratory distress, insomnia, etc.

215 **Outcome-related questions:** Discharged and death. Oxygen requirement, ICU referral

216 **Functional impact:** We examined functional implications in the post-covid state for at least 6  
217 months for overall functional status, fatigue score, and depression score.

218 **Operational definition:** Confirmed Covid-19, and its different severities were defined according  
219 to the WHO and National guidelines [19, 20].

220 **Case fatality rate:**

$$\text{CFR} = \frac{\text{NUMBER OF TOTAL DEATH SURING THE SAME PERIOD IN THE SAME WARD}}{\text{NUMBER OF TOTAL ADMISSION IN THE DEFINED PERIOD IN THE SELECTED WARD}} \times 100$$

223

224 **Duration of hospital stay:** The total period from the day of admission to the day of discharge.

225 **Waves of infection:** The first, second, and third waves extend between April 2020 to January

226 2020, February 2021 and May 2021, and June 2021 and September 2021, respectively [21,22].

227 **Post-COVID-19 condition: According to the Center for Disease Control, USA [23]**

228 Post-COVID conditions include a wide range of new, returning, or ongoing health problems that

229 people experience after contracting the SARS-CoV-2 causing COVID-19.

230 **Post-COVID fatigue:** The diagnostic criteria for post-COVID-19 fatigue were developed

231 according to the United States Institute of Medicine symptom criteria [24].

232 The Chalder Fatigue Scale [25], the Karnofsky Performance Status Scale [26], and the

233 depression scale were used to assess fatigue severity, overall functional status, and depression

234 [27].

## 235 **Data collection instrument**

236 For patients admitted to the hospital, data were collected on a data collection sheet. A telephone

237 directory was used for Post COVID-19 follow-up. We collected data from reports of outpatient,

238 inpatient, and virology departments.

## 239 **Data Collection procedure**

240 We collected all patients' files from the hospital record unit in the selected ward. Each file was

241 evaluated by one data collector and researcher. The completed data collecting sheet contains a

242 list of all available information. We obtained no specific procedure for missing data and

243 excluded files that did not contain essential information, such as patient demographics,

244 admission date, and discharge date. We collected the phone number from the hospital records  
245 and interviewed the patients for post-covid -19 complications at least 6 months after recovery.  
246 We collected data from the outpatient, inpatient, and virology departments using the Excel  
247 datasheet, which contains the patient's name, age, sex, date of attendance, outcome, admission,  
248 death, discharge, positive or negative status, etc.

## 249 **Data Quality Control**

250 Each data sheet was reviewed by two researchers; disagreements were resolved through  
251 discussion. We removed responses where respondents provided contradictory answers. Because  
252 each patient was coded and had a specified hospital record number, there was no scope for  
253 double responses.

## 254 **Data Processing and Analysis**

255 R (v4.1.1) was used to process data. We performed a network analysis with a tidy verse and q  
256 graph. Qualitative data with normal distribution were expressed as means (SD), while non-  
257 normal data were expressed as medians (IQR). We divided the respondents into groups of first,  
258 second, and third waves. We used the chi-square test to calculate quantitative data and one-way  
259 ANOVA to calculate quantitative data. A needed we used a post hoc analysis with Bonferroni  
260 adjustment, Dunn test, and Tukey's test. We determined epidemiological trends in the EXECL  
261 sheet. The p-value for statistical significance was set at  $<0.05$ . We did not impute any missing  
262 values, and they were included in the analysis.

## 263 **Ethical consideration**

264 The Institutional Ethical Committee of Dhaka Medical College approved this study (ERC-  
265 DMC/ECC/2021/55). As we mainly reviewed the hospital data, there was no need for written  
266 consent. The patients provided verbal consent for post-covid follow-up.

## 267 Results

268 We reviewed 1766 patient records and included 1597 patients' data for analysis in this mixed  
269 study of retrospective hospital review of hospital data and cross-sectional follow-up of patients  
270 admitted for post-COVID-19 complications. From these patients we followed 600 patients over  
271 the telephone for post-COVID-19 complications. Between April 2020 and September 2021, and  
272 38578 patients visited the outpatient department, 24501 patients were admitted, 57857 were  
273 tested for treatment at the virology department (Suppliment1).

274 **Table 1: Demographic characteristics and co-morbidity of the admitted patients in the**  
275 **three waves**

| Variable                      | Categories | Total patient<br>(n=1595)<br>(N) | First wave <sup>a</sup><br>(n=874)<br>(N) % | Second<br>wave <sup>b</sup><br>(n=349)<br>(N) % | Third wave <sup>c</sup><br>(n=372)<br>(N) % | P<br>value |
|-------------------------------|------------|----------------------------------|---------------------------------------------|-------------------------------------------------|---------------------------------------------|------------|
| Age<br>(n=1597),<br>mean (SD) |            | 47.91(15.67)                     | 43.82(14.31)                                | 50.79(15.95)                                    | 54.62(15.61)                                | <0.001     |
|                               | <40 years  | 512<br>32.1%                     | 364<br>41.6%                                | 84<br>24.1%                                     | 64<br>17.2%                                 |            |

|                                      |                |               |              |              |              |        |
|--------------------------------------|----------------|---------------|--------------|--------------|--------------|--------|
| Age<br>(n= 1595)                     |                |               |              |              |              | <0.001 |
|                                      | 40-60<br>years | 652<br>40.8%  | 366<br>41.9% | 139<br>39.8% | 147<br>39.5% |        |
|                                      | 60+ years      | 431<br>27.02% | 144<br>54.8% | 126<br>36.1% | 161<br>43.3% |        |
| sex<br>(n= 1595)                     | Female         | 627<br>39.31% | 283<br>32.4% | 191<br>54.7% | 153<br>41.0% | <0.001 |
|                                      | Male           | 968<br>60.68% | 590<br>67.6% | 158<br>45.3% | 220<br>59.0% |        |
| Fever<br>(n= 1595)                   | Present        | 1366<br>85.6% | 738<br>84.4% | 296<br>85.1% | 332<br>89.0% | 0.1    |
| Cough<br>(n= 1595)                   | Present        | 1040<br>65.2% | 522<br>59.7% | 228<br>65.5% | 290<br>78.0% | <0.001 |
| Running<br>nose<br>(n= 1595)         | Present        | 206<br>12.9%  | 143<br>16.4% | 16<br>4.6%   | 47<br>12.6%  | <0.001 |
| Respiratory<br>distress<br>(n= 1595) | Present        | 848<br>(53.1) | 403<br>46.1% | 194<br>55.7% | 251<br>67.1% | <0.001 |
| Sore throat<br>(n= 1595)             | Present        | 278<br>17.4%  | 198<br>22.7% | 33<br>9.5%   | 47<br>12.6%  | <0.001 |

|                               |                       |              |              |              |              |        |
|-------------------------------|-----------------------|--------------|--------------|--------------|--------------|--------|
| Hoarseness of voice (n= 1595) | Present               | 24<br>1.5%   | 11<br>1.3%   | 5<br>1.4%    | 8<br>2.1%    | 0.50   |
| Chest pain (n= 1595)          | Present               | 107<br>6.7%  | 52<br>6.0%   | 19<br>5.4%   | 36<br>9.6%   | 0.03   |
| Diarrhea (n= 1595)            | Present               | 152<br>9.5%  | 74<br>8.5%   | 18<br>5.2%   | 60<br>16.1%  | <0.001 |
| Vomiting (n= 1595)            | Present               | 96<br>6.1%   | 29<br>3.3%   | 8<br>2.3%    | 59<br>15.9%  | <0.001 |
| Anorexia (n= 1594)            | Present               | 274<br>17.1% | 123<br>14.1% | 38<br>11.0%  | 113<br>30.2% | <0.001 |
| Anosmia (n= 1593)             | Present               | 301<br>18.8% | 158<br>18.1% | 27<br>7.8%   | 116<br>31.2% | <0.001 |
| Headache (n= 1583)            | Present               | 252<br>15.7% | 145<br>16.6% | 25<br>7.2%   | 82<br>22.5%  | <0.001 |
| Lethargy (n= 1597)            | Present               | 436          | 231<br>26.4% | 106<br>30.4% | 99<br>26.5%  | 0.35   |
| Body ache (n= 1596)           | Present               | 286          | 107<br>12.2% | 87<br>25.0%  | 92<br>24.6%  | <0.001 |
| Presenting                    | Critical <sup>f</sup> | 25<br>1.5%   | 0<br>0.0%    | 2<br>0.6%    | 23<br>6.2%   | <0.001 |
|                               | Mild <sup>g</sup>     | 747<br>29.7% | 422<br>48.3% | 216<br>61.9% | 109<br>29.2% |        |

|                                                |                       |              |              |              |              |        |
|------------------------------------------------|-----------------------|--------------|--------------|--------------|--------------|--------|
| severity <sup>d</sup><br>(n= 1595)             |                       |              |              |              |              |        |
|                                                | Moderate <sup>h</sup> | 648<br>40.6% | 443<br>50.7% | 116<br>33.2% | 89<br>23.9%  |        |
|                                                | Severe <sup>i</sup>   | 175<br>10.9% | 8<br>0.9%    | 15<br>4.3%   | 152<br>40.8% |        |
| Ultimate<br>severity <sup>e</sup><br>(n= 1595) | Critical <sup>f</sup> | 107          | 32<br>3.7%   | 3<br>0.9%    | 72<br>19.3%  | <0.001 |
|                                                | Mild <sup>g</sup>     | 627          | 365<br>41.8% | 183<br>52.9% | 79<br>21.1%  |        |
|                                                | Moderate <sup>h</sup> | 589          | 383<br>43.8% | 128<br>37.0% | 78<br>20.9%  |        |
|                                                | Severe <sup>i</sup>   | 271          | 94<br>10.8%  | 32<br>9.2%   | 145<br>38.8% |        |
| Diabetes<br>(n= 1151)                          | Present               | 531<br>33.2% | 216<br>28.4% | 136<br>38.8% | 179<br>48.1% | <0.001 |
| Hypertension<br>(n= 1154)                      | Present               | 532<br>33.3  | 182<br>24.5% | 142<br>40.6% | 208<br>55.9% | <0.001 |
| Asthma<br>(n= 931)                             | Present               | 114<br>7.1%  | 57<br>8.0%   | 30<br>8.5%   | 27<br>16.0%  | <0.001 |
| IHD<br>(n= 930)                                | Present               | 123<br>7.7   | 29<br>4.1%   | 31<br>8.8%   | 63<br>16.9%  | <0.001 |
| Renal<br>disease                               | Present               | 103<br>6.4%  | 24<br>3.4%   | 32<br>9.1%   | 47<br>12.6%  | <0.001 |



|                                                                                                                                                                                                                                                                                                                                                                                                                                                                                                                                                                                                                                                                                                                                                                                                                                                                                                                                                                                                              |  |  |  |  |  |  |
|--------------------------------------------------------------------------------------------------------------------------------------------------------------------------------------------------------------------------------------------------------------------------------------------------------------------------------------------------------------------------------------------------------------------------------------------------------------------------------------------------------------------------------------------------------------------------------------------------------------------------------------------------------------------------------------------------------------------------------------------------------------------------------------------------------------------------------------------------------------------------------------------------------------------------------------------------------------------------------------------------------------|--|--|--|--|--|--|
| (n= 926)                                                                                                                                                                                                                                                                                                                                                                                                                                                                                                                                                                                                                                                                                                                                                                                                                                                                                                                                                                                                     |  |  |  |  |  |  |
| <ul style="list-style-type: none"><li>a- From April 2020 to January 2021,</li><li>b- From February 2021 to May 2021</li><li>c- From June 2021 to September 2021</li><li>d- The severity of the patient at the time of hospital admission</li><li>e- The severity of the patient in the course of the hospital stays</li><li>f- Critical: Patient requiring high flow oxygen or mechanical ventilation</li><li>g- Mild: Patients having mild symptoms of upper respiratory tract viral infection, including mild fever, cough (dry), sore throat, nasal congestion, malaise, headache, muscle pain, anosmia, or malaise;</li><li>h- Moderate: the patient has respiratory symptoms such as cough and shortness of breath are present without signs of severe pneumonia (tachypnea &gt;30 breaths/min and hypoxia: oxygen saturation &lt;90% on room air).</li><li>i- Severe: Patients with severe pneumonia require supplemental oxygen through nasal canal, facemask, or face mask with reservoir.</li></ul> |  |  |  |  |  |  |

276

277

278 The mean age (SD) of the hospital-admitted patients was 47.91(15.67) years, with patients in the  
279 and third waves being higher than those in the first wave ( $p < 0.001$ ). Patients above 60 years  
280 were mainly involved in the first wave 144 (54.8%), the 40–60 age group was primarily involved  
281 in the second wave 139 (39.8%), and those above 60 years were more likely to be infected in the  
282 third wave 161 (43.3%).

283 Men were predominantly admitted 968 (60.68%). However, in the second wave, the number of  
284 women, 191 (54.7%), was higher.

285 Fever was present in 1366 (85.6%) patients and did not differ among the three waves ( $p = 0.1$ ).

286 Cough was more prevalent in the second 288 (65.5%) and third waves 290 (78%) than in the first  
287 wave 522 (59.7%). Running nose was most prevalent in the first wave, 143 (16.4%), and least  
288 prevalent in the second wave, 16 (4.6%). Respiratory distress was the most prevalent in the third  
289 wave, 251 (67.1%), and the least prevalent in the first wave, 403 (46.1%). Sore throat occurred  
290 more prevalent in the first wave 198 (22.7%) than in the other waves. Diarrhea 60 (16.1) and

291 vomiting 59 (15.9%) were the most prevalent in the third wave. Anosmia was more prevalent in  
292 the third wave 116 (31.2%) than in other waves and less frequently in the second wave 27 (7.8%)  
293 than in other waves. However, headache was more prevalent in the third 82 (22.5%) and first  
294 wave 145 (16.6%) than in the second wave. Body aches occurred more commonly in the second  
295 87 (25%) and third 92 (24.6%) waves than in the first wave. (Table 1)

296 Patients that presented in a critical condition 23 (6.2%) and severe disease 152 (40.8%) were  
297 more prevalent in the third wave than in other waves. In the second wave, most cases were mild  
298 216 (61.9%). During the hospital stay, the severity of the patient's severity changed, and in the  
299 third wave, 72 (19.3%) critical and 145 (38.8%) severe diseases emerged. Mild-to-moderate  
300 illness was more common in the first and second waves than in the third wave.

301 Diabetes was more common among admitted patients in the second 136 (38.8%) and third waves  
302 179 (48.1%) than in the first wave. Hypertension was prevalent in the second 142 (40.6%) and  
303 third wave 208 (55.9%). Asthma 27 (16%), ischemic heart disease 63 (16.9%), and renal disease  
304 47 (12.6%) were the most prevalent in the third wave (Table 1).

## 305 **Symptoms Cluster in COVID-19**

306 We found three clusters of symptoms among the admitted COVID patients: 1. Fever, cough, and  
307 respiratory distress. 2. Anosmia, headache, and anorexia 3. Sore throat and running nose. The  
308 symptom clusters differed for the three waves. In the first wave, we found three clusters; 1.  
309 Respiratory distress and cough. 2. Anosmia and anorexia. 3. Running nose and sore throat. In the  
310 second wave, we found a cluster of headaches, running nose, sore throat, and hoarseness of  
311 voice. In the third wave, we found three clusters: 1. anorexia and anosmia, 2. fever and cough,  
312 and 3. headache, diarrhea, and vomiting. (Figure 1)

313 **Figure 1: Symptoms clusters in COVID-19.**

314 **Table 2: Investigation profile of the admitted patients in the three waves**

315

| Variable       | Total patient (N) | First wave Median (IQR) | Second wave Median (IQR)  | Third wave Median (IQR)  | P value |
|----------------|-------------------|-------------------------|---------------------------|--------------------------|---------|
| WBC            | 607               | 8.50<br>(6.2-11.72)     | 18.65<br>(14.55-24.00)    | 5.95<br>(1.28-10.23)     | <0.001  |
| Neutrophil (%) | 595               | 71.70<br>(60.92-83.00)  | 83.00<br>(79.0-87.0)      | 78.00<br>(68.0-86.0)     | <0.001  |
| Lymphocyte (%) | 595               | 21.75<br>(12.88-30.68)  | 12.00<br>(10.70-16.0)     | 18.00<br>(10.0-27.0)     | <0.001  |
| Platelet count | 575               | 247.00<br>(189.5-324.0) | 126.00<br>(29.9-276.00)   | 135.00<br>(31.00-250.00) | <0.001  |
| CRP            | 438               | 12.00<br>(6.0-34.77)    | 18.00<br>(8.68-68.50)     | 39.00<br>(13.0-85.0)     | <0.001  |
| creatinine     | 547               | 0.96<br>(0.80-1.12)     | 1.180<br>(0.95-6.62)      | 1.14<br>(0.90-1.40)      | <0.001  |
| D-dimer        | 458               | 0.47<br>(0.27-1.05)     | 1.52<br>(0.62-3.56)       | 0.79<br>(0.40-1.80)      | <0.001  |
| Ferritin       | 369               | 297.00<br>(122.0-642.0) | 1468.00<br>(973.5-2050.0) | 441.00<br>(235.5-1000.0) | 0.002   |

|              |     |   |                         |                         |       |
|--------------|-----|---|-------------------------|-------------------------|-------|
| Serum sodium | 191 | - | 138.00<br>(135.0-140.8) | 135.00<br>(132.0-138.0) | 0.121 |
|--------------|-----|---|-------------------------|-------------------------|-------|

316

317 The white blood cell count was high in the second wave, 18.65(14.5–24), and low in the third  
 318 wave. The platelet count was low in the third wave 78 (68–86). CRP was much higher in the  
 319 third wave 39 (13–85) and D-dimer 1.52 (0.63–3.56), and ferritin was high in the second wave  
 320 1468 (973–2050). (Table 2)

321 **Table 3: Outcome of the admitted patient in three waves**

322

| Variable                  | Categories | Total patient (N) | First wave (N) % | Second wave (N) %  | Third wave (N) %  | P value |
|---------------------------|------------|-------------------|------------------|--------------------|-------------------|---------|
| Ultimate severity         | Critical   | 107               | 32<br>29.9%      | 3<br>2.8%          | 72<br>67.3%       | <0.001  |
|                           | Mild       | 627               | 365<br>58.2%     | 183<br>29.2%       | 79<br>12.6%       |         |
|                           | Moderate   | 589               | 383<br>65.0%     | 128<br>21.7%       | 78<br>13.2%       |         |
|                           | Severe     | 271               | 94<br>34.7%      | 32<br>11.8%        | 145<br>53.5%      |         |
| Duration of hospital stay |            |                   | 13.0<br>(8.0-    | 12.0<br>(8.0-12.0) | 7.0<br>(4.0-11.0) | <0.001  |

|                                               |  |  |                  |                  |                  |        |
|-----------------------------------------------|--|--|------------------|------------------|------------------|--------|
|                                               |  |  | 20.0)            |                  |                  |        |
| Interval<br>symptom<br>onset and<br>admission |  |  | 5.0<br>(4.0-6.0) | 5.0<br>(5.0-6.0) | 5.0<br>(4.0-6.0) | <0.001 |

323

324 The patient developed a more severe disease in the third wave, and the duration of hospital stay  
325 was longer in the first wave 12 (8–20). (Table 3)

326

327 **Table 4: Trend of outpatient, inpatient and virology department consultation in three**  
328 **waves**

| Trait                 | Total | First wave       | Second wave  | Third wave      | P value |
|-----------------------|-------|------------------|--------------|-----------------|---------|
| Outpatient department |       |                  |              |                 |         |
| Total Attended        | 38578 | 19890 (51.6)     | 7347 (19.0)  | 11341 (29.4)    |         |
| Positive              | 5584  | 3134 (15.7%)     | 896 (12.1%)  | 1554<br>(13.7%) | <0.001  |
| Admitted              | 25721 | 13650<br>(68.6%) | 5419 (73.7%) | 6652<br>(58.6%) | <0.001  |
| Death                 | 329   | 127 (0.6%)       | 105 (1.4%)   | 97 (0.8%)       |         |
| Admission rate<br>(%) | 81.3  | 80.6             | 84.4         | 80.1            |         |
| <b>Gender</b>         |       |                  |              |                 |         |

It is made available under a [CC-BY 4.0 International license](https://creativecommons.org/licenses/by/4.0/) .

|                       |       |              |              |                 |        |
|-----------------------|-------|--------------|--------------|-----------------|--------|
| <b>Male</b>           |       |              |              |                 |        |
| Total Attended        | 22595 | 12274 (54.3) | 4341 (19.2)  | 5980 (26.5)     |        |
| Positive              | 3201  | 1895 (15.4%) | 518 (11.9%)  | 788 (13.1%)     | <0.001 |
| Admitted              | 15133 | 8541 (69.5%) | 3218 (74.1%) | 3374<br>(56.4%) | <0.001 |
| Death                 | 208   | 86 (0.7%)    | 64 (1.4%)    | 58 (0.9%)       |        |
| Admission rate<br>(%) | 81.6  | 81.2         | 84.7         | 80.0            |        |
| <b>Female</b>         |       |              |              |                 |        |
| Total Attended        | 15981 | 7614 (47.6)  | 3006 (18.8)  | 5361 (33.5)     |        |
| Positive              | 2383  | 1239 (16.2%) | 378 (12.5%)  | 766 (14.2)      | <0.001 |
| Admitted              | 10586 | 5107 (67%)   | 2201 (73.2%) | 3278<br>(61.1%) | <0.001 |
| Death                 | 121   | 41 (0.5%)    | 41 (1.3%)    | 39 (0.6%)       |        |
| Admission rate<br>(%) | 80.9  | 80.0         | 84.0         | 80.3            |        |
| <b>Age group</b>      |       |              |              |                 |        |
| <b>&lt;40 years</b>   |       |              |              |                 |        |
| Total Attended        | 14264 | 7297 (51.2)  | 2354 (16.5)  | 4613 (32.3)     |        |
| Positive              | 1623  | 1021 (13.9)  | 221 (9.3)    | 381 (8.2)       | <0.001 |
| Admitted              | 6266  | 3547 (48.6)  | 1162 (49.3)  | 1557 (33.7)     | <0.001 |
| Death                 | 49    | 20 (0.2)     | 13 (0.5)     | 16 (0.3)        |        |
| Admission rate        | 79.0  | 77.3         | 83.2         | 79.7            |        |

|                               |       |                     |                      |                     |         |
|-------------------------------|-------|---------------------|----------------------|---------------------|---------|
| (%)                           |       |                     |                      |                     |         |
| <b>40-60 years</b>            |       |                     |                      |                     |         |
| Total Attended                | 12759 | 6920 (54.2)         | 2457 (19.3)          | 3382 (26.5)         |         |
| Positive                      | 2097  | 1177 (17)           | 356 (14.4)           | 564 (16.6)          | <0.001  |
| Admitted                      | 9314  | 5099 (73.6)         | 1948 (79.2)          | 2267 (67)           | <0.001  |
| Death                         | 121   | 42 (0.6)            | 45 (1.8)             | 34 (1)              |         |
| Admission rate<br>(%)         | 80.8  | 80.7                | 82.9                 | 79.1                |         |
| <b>60+ years</b>              |       |                     |                      |                     |         |
| Total Attended                | 11490 | 5645 (49.1)         | 2516 (21.9)          | 3329 (29.0)         |         |
| Positive                      | 1852  | 929 (16.4)          | 316 (12.5)           | 607 (18.2)          | <0.001  |
| Admitted                      | 10101 | 4979 (88.2)         | 2300 (91.4)          | 2822 (84.7)         | <0.001  |
| Death                         | 153   | 64 (1.1)            | 47 (1.8)             | 42 (1.2)            |         |
| Admission rate<br>(%)         | 83.4  | 83.4                | 86.4                 | 81.3                |         |
| <b>Inpatient consultation</b> |       |                     |                      |                     |         |
| Trait                         | Total | First wave<br>N (%) | Second wave<br>N (%) | Third wave<br>N (%) | P value |
| Total admission               | 24501 | 12797 (52.2)        | 5317 (21.7)          | 6387 (26.1)         | 0.0004  |
| Oxygen support                | 14198 | 6865 (48.4)         | 3332 (23.4)          | 4001 (28.2)         | <0.0001 |
| Percentage of                 |       | 61.8%               | 69.43%               | 75.29%              | <0.0001 |

|                            |              |                             |                              |                             |                |
|----------------------------|--------------|-----------------------------|------------------------------|-----------------------------|----------------|
| the patient getting oxygen |              |                             |                              |                             |                |
| ICU admission              | 4030         | 3442 (26.8%)                | 588 (11%)                    | ---                         | <0.0001        |
| Death                      | 5057         | 2584 (20%)                  | 1019 (19%)                   | 1454 (22.7%)                | <0.0001        |
| <b>Virology department</b> |              |                             |                              |                             |                |
| <b>Trait</b>               | <b>Total</b> | <b>First wave<br/>N (%)</b> | <b>Second wave<br/>N (%)</b> | <b>Third wave<br/>N (%)</b> | <b>P value</b> |
| Total population           |              |                             |                              |                             |                |
| Total test                 | 57857        | 26708 (46.1)                | 13214 (22.8)                 | 17935 (31.0)                |                |
| Positive                   | 12870        | 5962 (46.3)                 | 2814 (21.9)                  | 4094 (31.8)                 | <0.001         |
| Positivity rate (%)        | 22.2%        | 22.3                        | 21.3                         | 22.8                        |                |
| <b>Gender</b>              |              |                             |                              |                             |                |
| <b>Male</b>                |              |                             |                              |                             |                |
| Total test                 | 32517        | 15146 (46.6)                | 7591 (23.3)                  | 9780 (30.1)                 |                |
| Positive                   | 7082         | 3416 (48.2)                 | 1553 (21.9)                  | 2113 (29.8)                 | <0.001         |
| Positivity rate (%)        | 21.8         | 22.6                        | 20.5                         | 21.6                        |                |
| <b>Female</b>              |              |                             |                              |                             |                |
| Total test                 | 25312        | 11542 (45.6)                | 5619 (22.2)                  | 8151 (32.2)                 |                |
| Positive                   | 5782         | 2542 (44.0)                 | 1260 (21.8)                  | 1980 (34.2)                 | <0.001         |



|                     |       |              |             |             |        |
|---------------------|-------|--------------|-------------|-------------|--------|
| Positivity rate (%) | 22.8  | 22.0         | 22.4        | 24.3        |        |
| <b>Age group</b>    |       |              |             |             |        |
| <b>&lt;40</b>       |       |              |             |             |        |
| Total test          | 27055 | 13408 (49.6) | 5291 (19.6) | 8356 (30.9) |        |
| Positive            | 5555  | 2721 (49.0)  | 1063 (19.1) | 1771 (31.9) | <0.001 |
| Positivity rate (%) | 20.5  | 20.3         | 20.1        | 21.2        |        |
| <b>40-60</b>        |       |              |             |             |        |
| Total test          | 13033 | 6215 (47.7)  | 2570 (19.7) | 4248 (32.6) |        |
| Positive            | 3148  | 1538 (48.9)  | 582 (18.5)  | 1028 (32.7) | <0.001 |
| Positivity rate (%) | 24.2  | 24.7         | 22.6        | 24.2        |        |
| <b>&gt;60</b>       |       |              |             |             |        |
| Total test          | 8210  | 3477 (42.4)  | 1678 (20.4) | 3055 (37.2) |        |
| Positive            | 2114  | 911 (43.1)   | 369 (17.5)  | 834 (39.5)  | <0.001 |
| Positivity rate (%) | 25.7  | 26.2         | 22.0        | 27.3        |        |

329

330 Confirmed COVID-19 cases were higher (15.7%) in the second wave than in the other waves,  
 331 the admission rate 73.7%, and the death rate 1.4% were higher in the second wave than in other  
 332 waves. The proportion of confirmed COVID-19 cases was higher among women in all waves. In  
 333 the third wave, the admission rate among women 61.1% was higher than among men. The

334 number of positive cases was higher in those below 40 years in the first wave 13.9% and above  
335 60 years in the third wave 18.2%. The admission rate of patients below 40 years was lower in the  
336 third wave 33.7%. In the second wave, the admission rate among the 40–60-year age group 79%  
337 and above 60 years age group 91.4% was higher than in other waves. In the second wave, the  
338 death rate was higher among men 1.4% and women, 1.3% In the second wave, the death rate was  
339 high in the 40–60-year age group and above 60-year age group. The admission rate was higher in  
340 patients aged above 60 years in all three waves.

341 52% of patient were admitted in the first wave and 75% received more oxygen in the third wave.

342 Death was more common 51% in the first wave.

343 The patient was tested more frequently in the first and third waves than in the second wave. The  
344 positivity was high in the third wave 22.8%. In the third wave, the positivity rate was high among  
345 women 24.3%. The incidence rate of patients above 60 years was high in the first and third  
346 waves 27.3%. (Table 4)

347 The daily COVID-19 infection rate was higher in the third wave and the duration of the second  
348 wave was short. The first wave lasted longer than the other wave, with an elevated and gradual  
349 infection rate decline.

350 The rate of testing was equal for all three waves. The positivity rate was higher during the third  
351 than in the first and second waves (Figure 2, Supplement 2).

352

353 **Figure 2: Epidemiologic trend of number of test positivity, hospital admission and death in**  
354 **three waves**

355 **Table 5: post COVID -19 complications of the three waves**

| Trait | Total patient | First wave | Second wave | Third wave | P value |
|-------|---------------|------------|-------------|------------|---------|
|-------|---------------|------------|-------------|------------|---------|

|                                 |            |            |            |            |       |
|---------------------------------|------------|------------|------------|------------|-------|
|                                 | 600        | 200        | 200        | 200        |       |
| Age, Mean<br>(SD)               | 45.2(15.8) | 45.5(16.3) | 43.6(14.3) | 46.5(16.5) | 0.19  |
| Sex, Male n<br>(%)              | 337(56.2)  | 123(61.5)  | 97(48.5)   | 117(58.5)  | 0.08  |
| Post COVID-19 conditions        |            |            |            |            |       |
| Number of post-covid conditions |            |            |            |            | 0.24  |
| None                            | 40(6.7)    | 17(8.5)    | 12(6)      | 11(5.5)    |       |
| Single                          | 93(15.5)   | 38(19)     | 30(15.1)   | 25(12.5)   |       |
| Multiple                        | 466(77.7)  | 145(72.5)  | 157(78.9)  | 164(82)    |       |
| Symptoms                        |            |            |            |            |       |
| Feverish<br>feeling             | 16(2.7)    | 6(3)       | 4(2)       | 6(3)       | 0.7   |
| Fatigue                         | 421(70.2)  | 126(63)    | 144(72)    | 151(75.5)  | 0.03  |
| Cough                           | 127(21.2)  | 35(17.6)   | 58(29)     | 34(17)     | 0.004 |
| Respiratory<br>distress         | 40(6.7)    | 14(7)      | 15(7.5)    | 11(5.5)    | 0.7   |
| Hoarseness of<br>voice          | 16(2.7)    | 9(4.5)     | 2(1)       | 5(2.5)     | 0.09  |
| Chest pain                      | 142(23.7)  | 44(22.1)   | 40(20.1)   | 58(29)     | 0.09  |
| Anorexia                        | 135(22.5)  | 40(20)     | 39(19.5)   | 56(28)     | 0.07  |
| Anosmia                         | 16(2.7)    | 7(3.5)     | 4(2)       | 5(2.5)     | 0.6   |
| Headache                        | 146(24.3)  | 46(23)     | 49(24.5)   | 51(25.5)   | 0.08  |

|                              |           |           |          |          |       |
|------------------------------|-----------|-----------|----------|----------|-------|
| Memory disturbance           | 152(25.4) | 46(23)    | 64(32)   | 42(21.1) | 0.03  |
| Insomnia                     | 73(12.2)  | 20(10)    | 29(14.5) | 24(11)   | 0.38  |
| Hypersomnia                  | 4(0.7)    | 2(1)      | 2(1)     |          | 0.36  |
| Sleep pattern alteration     | 6(1)      | 2(1)      | 2(1)     | 2(1)     | <0.99 |
| Arthralgia                   | 69(11.5)  | 25(12.6)  | 28(14)   | 16(8)    | 0.15  |
| Confusion                    | 29(4.8)   | 5(2.5)    | 12(6)    | 12(6)    | 0.18  |
| New onset hypertension       | 15(2.5)   | 2(1)      | 7(3.5)   | 6(3)     | 0.23  |
| New onset Diabetes           | 23(3.8)   | 8(4)      | 10(5)    | 5(2.5)   | 0.42  |
| Fatigue score, mean (SD)     | 4.7(2.9)  | 3.1(2.9)  | 4.2(3.3) | 3.9(3.1) | 0.001 |
| Functional status, mean (SD) | 90.3(7.4) | 90.9(7.7) | 90(7.6)  | 90(6.9)  | 0.35  |
| Depression                   | 143(25.2) | 58(40.6)  | 49(34.3) | 36(25.2) | 0.03  |

356

357 The percentage of patients that developed post-COVID complications was equal in all three  
 358 waves. However, patients in the second wave developed more post-covid cough and memory  
 359 disturbance depression, and patients in the third wave developed more fatigue than those in other  
 360 waves. However, patients in the second wave had increased fatigue scores. The functional status

361 of the patients was similar in the three waves. We found five symptom clusters. However, they  
362 did not differ among the three waves (Figure 3).

### 363 **Figure 3: Symptom cluster in post COVID-state**

364

365

## 366 **Discussion**

367 This study compared the first, second, and third COVID-19 waves in terms of presentation,  
368 outcomes, and hospital epidemiological trends. The first wave lasted longer, and however, the  
369 second wave lasted for a short period. We found age and sex differences in the admission rates in  
370 the three waves. Cough, runny nose, respiratory distress, diarrhea, vomiting, and anosmia were  
371 the most common symptom in the three waves. The symptom cluster differed among the three  
372 waves. Disease severity, duration of hospital stay, and severity markers differed. We found  
373 disparities in the frequencies of the positivity test and death rates. The three waves had similar  
374 Post COVID complications.

375 This study was conducted at the tertiary center of Dhaka. The treatment facility differs from  
376 center to center and region to region; therefore, we cannot generalize the findings across the  
377 nation and globally.

378 During replication, a mutation in the genetic code of SARS-CoV-2 leads to the development of a  
379 new variant. The behaviors of variants, such as virulence and transmissibility, differ [28]. WHO  
380 named the variant to be monitored with the Greek alphabet and named from alpha to zeta [29]. In  
381 Bangladesh, until September 2021, alpha, beta, and delta variants were dominant at different  
382 times creating, three waves of COVID-19: the first wave was caused by alpha, the second wave

383 was caused by beta, and the third wave caused by delta variants [18]. Epidemiological and  
384 disease characteristics differ in various studies [16,30,31].

385 In Bangladesh, the first wave lasted approximately 8 months, the second wave approximately 2  
386 months, and the third wave approximately 3 months. This was due to the variations'  
387 transmissibility; delta was 63–167% more transmissible than alpha [32]. Therefore, the most  
388 susceptible people became infected faster, replacing existing variants. Delta and beta variants  
389 spread quickly in Bangladesh, and delta quickly became the dominant variant. Omicron was 2.8  
390 times more transmissible than Delta, thus replacing Delta in a short period [33].

391 In this study, we found a variation in the demographic patterns across the three variants.

392 Young people were more affected in the initial wave, as evidenced by the high number of  
393 positive cases in the virology laboratory among the young. However, the elderly had a higher  
394 positivity rate. The proportion of older adult patients in the hospitalized patients was higher in  
395 the first and third waves than in the second wave. The admission rate among the attended  
396 patients in the outpatient department was higher in the second wave than in the first and third  
397 waves. Because of their increased mobility the younger age group became infected in large  
398 numbers. Immune senescence and various comorbidities could explain the older adults'  
399 admission. The viral receptors ACE2 and CD26 are more expressed in senescent cells, which  
400 explains why older adults are more susceptible to infection [35]. The virus affinity for the  
401 receptor varies among the variants. This explains the age group variations among variants [36].

402

403 The overall number of admitted men was higher than women. However, the number of women  
404 admitted was higher in the second wave. Admission and death rates were higher among men.  
405 However,, women had a higher positivity rate than men, especially in the second and third

406 waves. Men had higher rate of incidence of COVID-19 due to the altered immunologic response,  
407 associated comorbidity, hormonal differences, and smoking habits [35]. angiotensin-converting  
408 enzyme (ACE) receptor expression is higher in women because its genetic loci are on the X  
409 chromosome [37]. The *TMPRSS2* gene is located on chromosome 21q22.3[38]. Some variants  
410 have a higher affinity for TMPRSS than for ACE II. This might explain the gender differences in  
411 the expression of the various COVID-19 variants. Again, increased testosterone levels may  
412 increase the probability of microthrombi formation [39], which is the underlying  
413 pathophysiology of severe COVID-19.

414 The duration of Hospital admission was longer in the first wave, which was most likely due to  
415 the severity of the disease at the time of discharge. In the first wave, most patients were admitted  
416 because of isolation, and their release was determined by the time of PCR negativity. ICU  
417 admission was higher in the first wave due fear an unnecessary patient transfer to the ICU. The  
418 death rate was higher in the third wave than in other waves.

419 The different affinities of the viruses can explain the heterogeneous presentation and clustering  
420 of various variants to the receptor. The virus's ability to escape immunity [40] can explain the  
421 mutant strain's varied presentation and severity.

422 The three waves had slightly different post-COVID-19 complications. Further studies on its  
423 pathogenesis and immunological response are needed.

424 Because this was a single-center study, genotyping was either not performed or was impractical  
425 for all patients. This was a retrograde study and a review of the documents. Therefore, missing  
426 information was likely.

## 427 **Conclusion**

428 This study revealed that during the COVID-19 waves, the presenting features, outcomes, and  
429 epidemiologic trends were different.

### 430 **Recommendation**

431 In each of the three waves, COVID-19 occurred differently. A mutant strain of the SARS-CoV-2  
432 was most likely the cause of these differences. Therefore, we recommend the following.

- 433 1. There should be genetic surveillance for the identification of the specific variant  
434 of interest.
- 435 2. At the onset of each wave, intensive epidemiologic surveillance should be  
436 conducted.
- 437 3. There should be diversity in each wave's strategy for disease control planning,  
438 treatment, and hospital management.

### 439 **Acknowledgments**

440 We are grateful to Dhaka Medical College Hospital authority for giving us permission to access  
441 the hospital records; without their help it will be impossible to conduct this study.

442

### 443 **References:**

- 444 1. World Health Organization. GCM teleconference – Note for the Records. 10 January  
445 2020. Subject: Pneumonia in Wuhan, China. Available from: [https://www.who.int/  
446 blueprint/10-01-2020-nfr-gcm.pdf?ua=](https://www.who.int/blueprint/10-01-2020-nfr-gcm.pdf?ua=).



- 447 2. World Health Organization. Novel coronavirus (2019-nCoV). Situation Report – 1. 21  
448 January 2020. Available from: [https://www.who.int/docs/default-source\\_/coronaviruse](https://www.who.int/docs/default-source_/coronaviruse/situation-reports/20200121-sitrep-1-2019-ncov.pdf?sfvrsn=20a99c10_4)  
449 [/situation-reports/20200121-sitrep-1-2019-ncov.pdf?sfvrsn=20a99c10\\_4](https://www.who.int/docs/default-source_/coronaviruse/situation-reports/20200121-sitrep-1-2019-ncov.pdf?sfvrsn=20a99c10_4).
- 450 3. WHO Director-General's opening remarks at the media briefing on COVID-19 - 11  
451 March 2020, available from: [https://www.who.int/dg/speeches/detail/who-director-](https://www.who.int/dg/speeches/detail/who-director-general-s-opening-remarks-at-the-media-briefing-on-covid-19---11-march-2020)  
452 [general-s-opening-remarks-at-the-media-briefing-on-covid-19---11-march-2020](https://www.who.int/dg/speeches/detail/who-director-general-s-opening-remarks-at-the-media-briefing-on-covid-19---11-march-2020).
- 453 4. <https://www.worldometers.info/coronavirus/>, Accessed 25 November 2021.
- 454 5. [https://www.who.int/influenza/resources/documents/pandemic\\_phase\\_descriptions\\_and\\_](https://www.who.int/influenza/resources/documents/pandemic_phase_descriptions_and_actions.pdf)  
455 [actions.pdf](https://www.who.int/influenza/resources/documents/pandemic_phase_descriptions_and_actions.pdf). Accessed 25 November 2021.
- 456 6. <https://www.history.com/news/pandemics-end-plague-cholera-black-death-smallpox>.  
457 Accessed 25 November 2021
- 458 7. Kissler SM, Tedijanto C, Goldstein E, Grad YH, Lipsitch M. **Projecting the**  
459 **transmission dynamics of SARS-CoV-2 through the postpandemic period.**  
460 *Science* 22 May 2020:Vol. 368, Issue 6493, pp. 860-868. DOI: 10.1126/science.abb5793
- 461 8. [https://www.theguardian.com/world/2021/mar/22/lockdowns-return-extended-third-](https://www.theguardian.com/world/2021/mar/22/lockdowns-return-extended-third-wave-covid-europe)  
462 [wave-covid-europe](https://www.theguardian.com/world/2021/mar/22/lockdowns-return-extended-third-wave-covid-europe). Accessed 25 November 2021.
- 463 9. <https://time.com/5951490/covid-fourth-wave/> Accessed 25 November 2021.
- 464 10. <https://www.who.int/csr/don/31-december-2020-sars-cov2-variants/en/> Accessed 25  
465 November 2021.
- 466 11. <https://www.nature.com/articles/d41586-020-02544-6>. Accessed 25 November 2021.
- 467 12. <https://www.who.int/csr/don/31-december-2020-sars-cov2-variants/en/>. Accessed 25  
468 November 2021.

- 469 13. [European Centre for Disease Prevention and Control 20 Dec 2020 Threat Assessment](#)  
470 [Brief](#). Accessed 25 November 2021.
- 471 14. [https://www.cdc.gov/coronavirus/2019-ncov/science/science-briefs/scientific-brief-](https://www.cdc.gov/coronavirus/2019-ncov/science/science-briefs/scientific-brief-emerging-variants.html)  
472 [emerging-variants.html](https://www.cdc.gov/coronavirus/2019-ncov/science/science-briefs/scientific-brief-emerging-variants.html). Accessed 19 November 2021.
- 473 15. [https://www.who.int/docs/default-source/coronaviruse/situation](https://www.who.int/docs/default-source/coronaviruse/situation-reports/20210427-weekly-epi-update-37.pdf?sfvrsn=a1ab459c_5&download=true)  
474 [reports/20210427\\_weekly\\_epi\\_update\\_37.pdf?sfvrsn=a1ab459c\\_5&download=true](https://www.who.int/docs/default-source/coronaviruse/situation-reports/20210427-weekly-epi-update-37.pdf?sfvrsn=a1ab459c_5&download=true).  
475 Accessed 19 November 2021.
- 476 16. Ranjan, R., Sharma, A., Verma, M.K., 2021. Characterization of the Second Wave of  
477 COVID-19 in India. medRxiv 2021.04.17.21255665. doi: 10.1101/2021.04.17.21255665
- 478 17. [https://www.tbsnews.net/coronavirus-chronicle/covid-19-bangladesh/covid-deaths-drop-](https://www.tbsnews.net/coronavirus-chronicle/covid-19-bangladesh/covid-deaths-drop-41-lowest-39-days-242425)  
479 [41-lowest-39-days-242425](https://www.tbsnews.net/coronavirus-chronicle/covid-19-bangladesh/covid-deaths-drop-41-lowest-39-days-242425). Accessed 19 November 2021.
- 480 18. <https://www.icddrb.org/news-and-events/icddrb-in-the-news>. Accessed 19 November  
481 2021.
- 482 19. WHO guidance on management of severe acute respiratory infection (SARI) when  
483 COVID19 is suspected. Accessed November 1, 2020. [//www.who.int/publications-](https://www.who.int/publications-detail/clinical-management-of-severe-acute-respiratory-infection-when-novel-coronavirus-(ncov)-infection-is-suspected)  
484 [detail/clinical-management-of-severe-acute-respiratory-infection-when-novel-](https://www.who.int/publications-detail/clinical-management-of-severe-acute-respiratory-infection-when-novel-coronavirus-(ncov)-infection-is-suspected)  
485 [coronavirus-\(ncov\)-infection-is-suspected](https://www.who.int/publications-detail/clinical-management-of-severe-acute-respiratory-infection-when-novel-coronavirus-(ncov)-infection-is-suspected).
- 486 20. National Guidelines on Clinical Management of Coronavirus Disease 2019 (COVID-19).  
487 27 May, 2020. Accessed November 1, 2020. [https://dghs.gov.bd/images/docs/Guideline/](https://dghs.gov.bd/images/docs/Guideline/COVID.Guideline.pdf)  
488 [COVID.Guideline.pdf](https://dghs.gov.bd/images/docs/Guideline/COVID.Guideline.pdf).
- 489 21. Bari R and Sultana F (2021) Second Wave of COVID-19 in Bangladesh: An Integrated  
490 and Coordinated Set of Actions Is Crucial to Tackle Current Upsurge of Cases and  
491 Deaths. Front. Public Health 9:699918. doi: 10.3389/fpubh.2021.699918

- 492 22. Devnath P, Hossain MJ, Emran TB, Mitra S. Massive third wave of COVID-19 outbreak  
493 in Bangladesh: a co-epidemic of dengue might worsen the situation. *Future Virol.* 2022  
494 Jan;10.2217/fvl-2021-0182. doi: 10.2217/fvl-2021-0182. Epub 2022 Mar 8. PMID:  
495 35284001; PMCID: PMC8906578.
- 496 23. Post-COVID conditions. Centers for disease control and prevention, USA. Accessed 19  
497 July 2021. From [https://www.cdc.gov/coronavirus/2019-ncov/long-term-](https://www.cdc.gov/coronavirus/2019-ncov/long-term-effects/index.html)  
498 [effects/index.html](https://www.cdc.gov/coronavirus/2019-ncov/long-term-effects/index.html)
- 499 24. Committee on the Diagnostic Criteria for Myalgic Encephalomyelitis/Chronic Fatigue  
500 Syndrome; Board on the Health of Select Populations; Institute of Medicine. *Beyond*  
501 *Myalgic Encephalomyelitis/Chronic Fatigue Syndrome: Redefining an Illness.*  
502 Washington (DC): National Academies Press (US); 2015 Feb 10. Available from:  
503 <https://www.ncbi.nlm.nih.gov/books/NBK274235/> DOI: 10.17226/19012.
- 504 25. [Chalder, T.](#); [Berelowitz, G.](#); [Pawlikowska, T.](#); [Watts, L.](#); [Wessely, S.](#); [Wright, D.](#);  
505 [Wallace, E. P.](#) (1993). ["Development of a fatigue scale"](#). *Journal*  
506 *of Psychosomatic Research.* **37** (2): 147–153. [ISSN 0022-3999.](#) [PMID 8463991](#)
- 507 26. Karnofsky D, Burchenal J, The clinical evaluation of chemotherapeutic agents in cancer.  
508 In: MacLeod C, ed. *Evaluation of Chemotherapeutic Agents.* New York, NY: Columbia  
509 University Press; 1949:191–205.
- 510
- 511 27. Kroenke, K., Spitzer, R. L., & Williams, J. B. (2001). The PHQ-9: validity of a brief  
512 depression severity measure. *Journal of general internal medicine,* *16*(9), 606–613.  
513 <https://doi.org/10.1046/j.1525-1497.2001.016009606.x>

- 514 28. Islam S, Islam T, Islam MR. New Coronavirus Variants are Creating More Challenges to  
515 Global Healthcare System: A Brief Report on the Current Knowledge. *Clin Pathol*. 2022  
516 Feb 3;15:2632010X221075584. doi: 10.1177/2632010X221075584. PMID: 35141522;  
517 PMCID: PMC8819824.
- 518 29. <https://www.cdc.gov/coronavirus/2019-ncov/variants/variant-classifications>. Accessed on  
519 01.11.21
- 520 30. S. Iftimie, A. F. López-Azcona, I. Vallverdú et al., “First and second waves of  
521 coronavirus disease-19: a comparative study in hospitalized patients in Reus,  
522 Spain,” *PLoS One*, vol. 16, no. 3, Article ID e0248029, 2021.
- 523 31. Kunno J, Supawattanabodee B, Sumanasrethakul C, Wiriyasivaj B, Kuratong S,  
524 Kaewchandee C. Comparison of Different Waves during the COVID-19 Pandemic:  
525 Retrospective Descriptive Study in Thailand. *Adv Prev Med*. 2021 Oct 8; 2021:5807056.  
526 doi: 10.1155/2021/5807056. PMID: 34659835; PMCID: PMC8519693.
- 527 32. Earnest, R, Uddin, R, Matluk, N, et al. Comparative transmissibility of SARS-CoV-2  
528 variants Delta and Alpha in New England, USA. *Cell Rep*  
529 *Med*. 2022;3(4):100583. <https://doi.org/10.1016/j.xcrm.2022.100583>
- 530 33. De La Cruz-Hernández, S., & Álvarez-Contreras, A. (2022). Omicron Variant in Mexico:  
531 The Fourth COVID-19 Wave. *Disaster Medicine and Public Health Preparedness*, 1-2.  
532 doi:10.1017/dmp.2022.160
- 533 34. Monod M, Blenkinsop A, Xi X, Hebert D, Bershian S, Tietze S, Baguelin M, Bradley VC,  
534 Chen Y, Coupland H, Filippi S, Ish-Horowicz J, McManus M, Mellan T, Gandy A,  
535 Hutchinson M, Unwin HJT, van Elsland SL, Vollmer MAC, Weber S, Zhu H, Bezancon  
536 A, Ferguson NM, Mishra S, Flaxman S, Bhatt S, Ratmann O; Imperial College COVID-

- 537 19 Response Team. Age groups that sustain resurging COVID-19 epidemics in the  
538 United States. *Science*. 2021 Mar 26;371(6536):eabe8372. doi: 10.1126/science.  
539 abe8372. Epub 2021 Feb 2. PMID: 33531384; PMCID: PMC8101272.
- 540 35. Al-Bari MAA, Hossain S, Zahan MK. Exploration of sex-specific and age-dependent  
541 COVID-19 fatality rate in Bangladesh population. *World J Radiol*. 2021 Jan 28;13(1):1-  
542 18. doi: 10.4329/wjr.v13.i1.1. PMID: 33574990; PMCID: PMC7852349.
- 543 36. Han Y, Wang Z, Wei Z, Schapiro I, Li J. Binding affinity and mechanisms of SARS-  
544 CoV-2 variants. *Comput Struct Biotechnol J*. 2021; 19:4184-4191. doi:  
545 10.1016/j.csbj.2021.07.026. Epub 2021 Jul 26. PMID: 34336146; PMCID:  
546 PMC8312055.
- 547 37. Schurz H, Salie M, Tromp G, Hoal EG, Kinnear CJ, Möller M. The X chromosome and  
548 sex-specific effects in infectious disease susceptibility. *Hum Genomics*. 2019; **13:2**.
- 549 38. Stopsack KH, Mucci LA, Antonarakis ES, Nelson PS, Kantoff PW. *TMPRSS2* and  
550 COVID-19: Serendipity or Opportunity for Intervention? *Cancer Discov*. 2020; **10:779–**  
551 **782**.
- 552 39. Walker RF, Zakai NA, MacLehose RF, Cowan LT, Adam TJ, Alonso A, Lutsey PL.  
553 Association of Testosterone Therapy With Risk of Venous Thromboembolism Among  
554 Men With and Without Hypogonadism. *JAMA Intern Med*. 2020; **180:190–197**.
- 555 40. Liu H, Wei P, Kappler JW, Marrack P, Zhang G. SARS-CoV-2 Variants of Concern and  
556 Variants of Interest Receptor Binding Domain Mutations and Virus Infectivity. *Front*  
557 *Immunol*. 2022 Jan 27; 13:825256. doi: 10.3389/fimmu.2022.825256. PMID: 35154144;  
558 PMCID: PMC8828474.
- 559

560  
561  
562  
563  
564  
565  
566  
567  
568  
569  
570  
571  
572  
573  
574  
575  
576  
577  
578  
579  
580  
581

## Supporting Information:

1. Supplement 1: Patient selection and distribution of the patient for this cross-sectional study
2. Supplement 2: Difference in daily oxygen support, daily positive cases and daily test variability in three waves

It is made available under a [CC-BY 4.0 International license](#) .

582

583

584

585

586

587

588

589

590

591

592

593

594

595

596

597

598

599

600

601

602

603

It is made available under a [CC-BY 4.0 International license](#) .

604

605

606

607



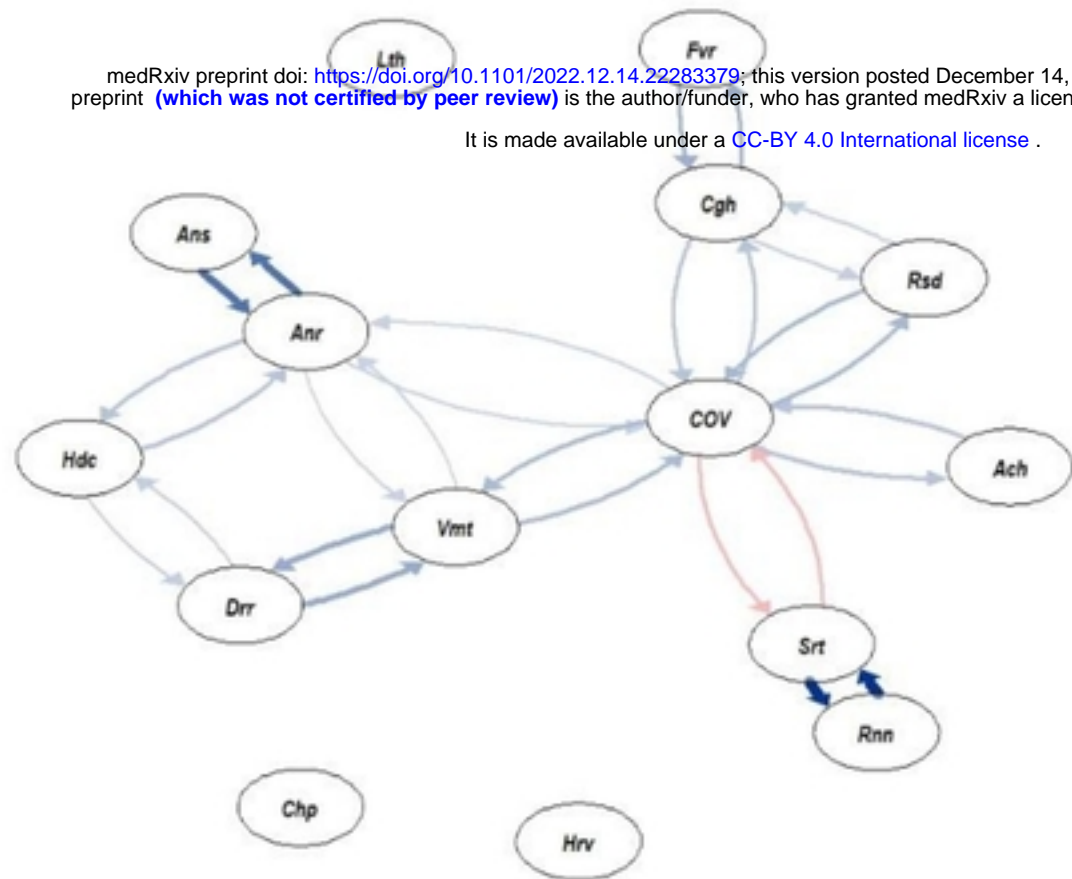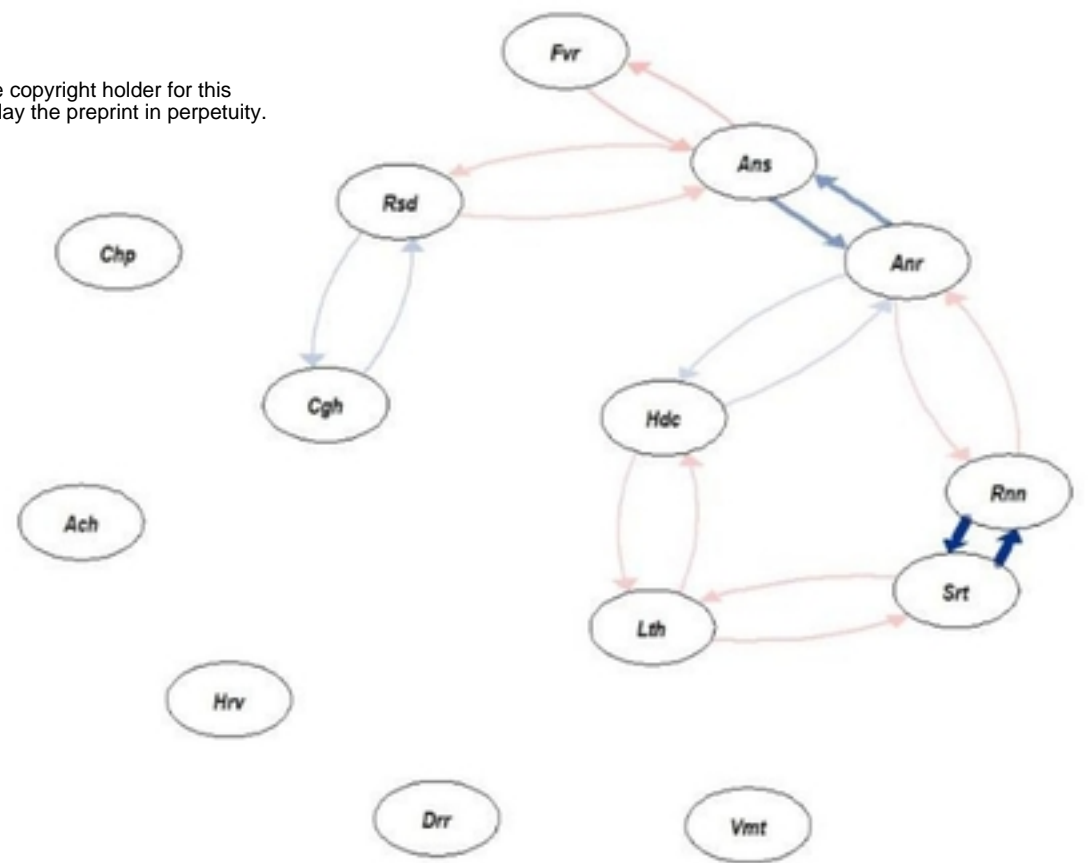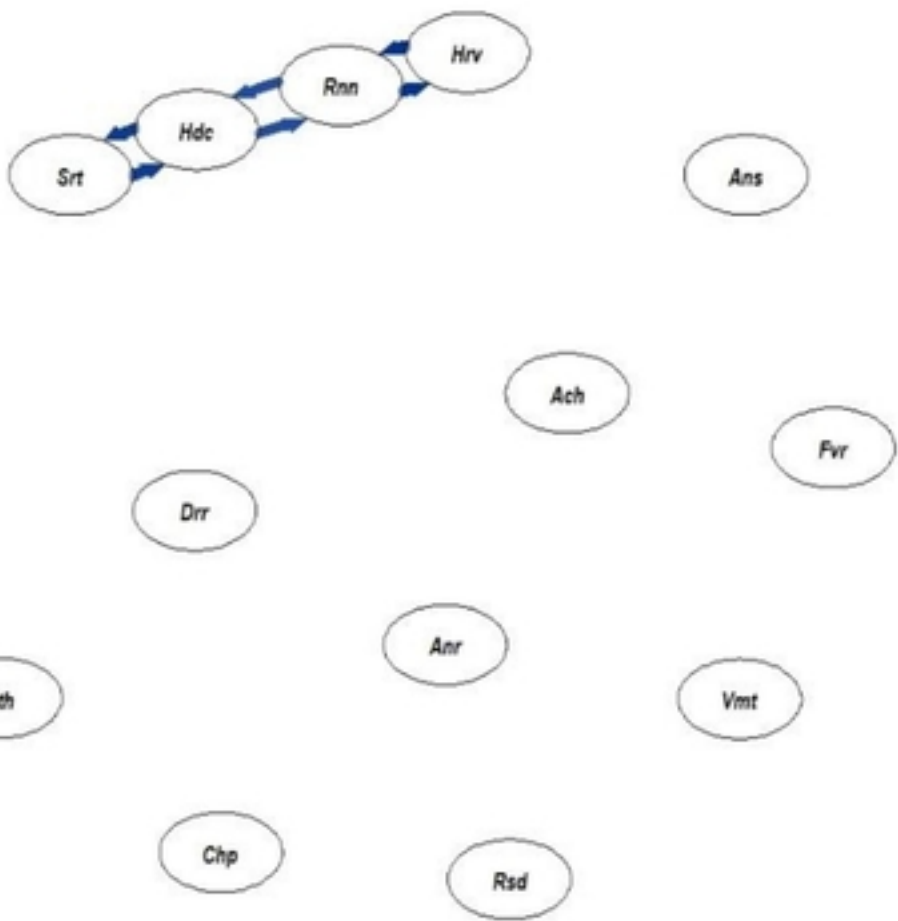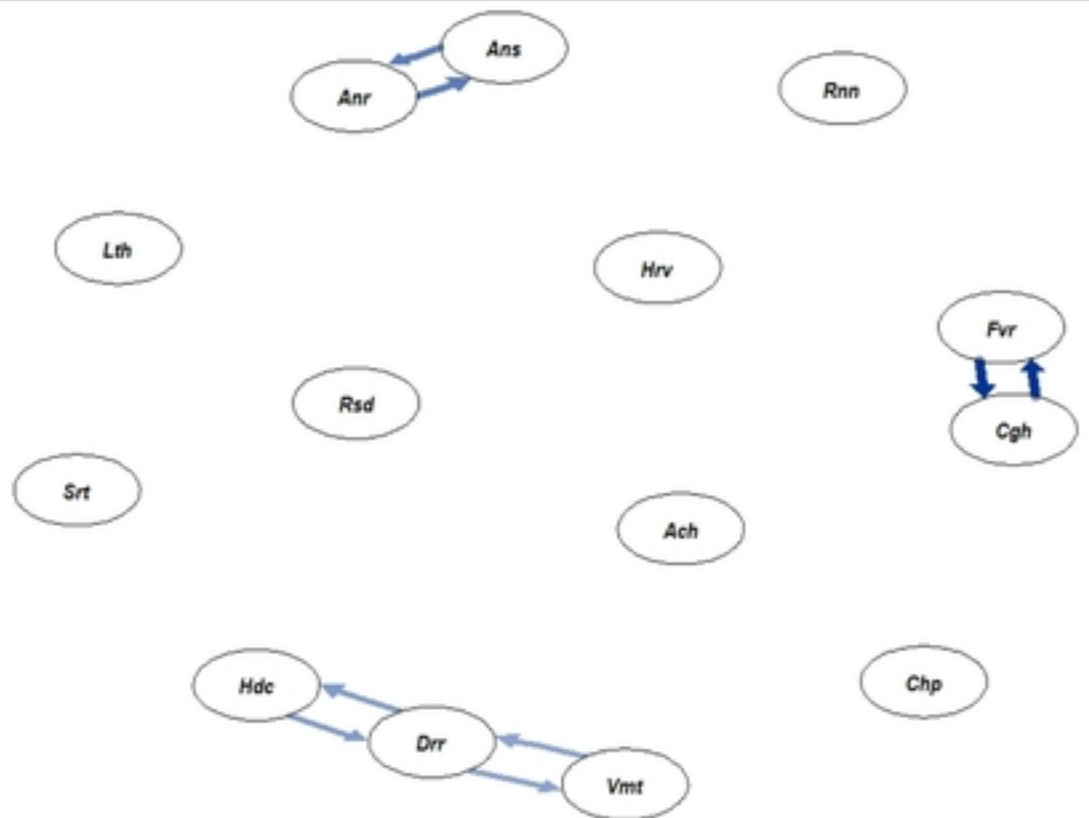

Figure 1

## Figure 1: Symptoms clusters in COVID-19

- a. According to general clusters of symptoms, We found three clusters of symptoms among the admitted patients with COVID-19: 1. Fever, cough, and respiratory distress. 2. Anosmia, headache, and anorexia, 3. Sore throat and running nose. b . In the first wave, we found three clusters 1. Respiratory distress and cough, 2. Anosmia anorexia, and 3. Running nose and sore throat. c. In the second wave, we found a cluster headache, running nose, sore throat, and hoarseness of voice. d. In the third wave, we found three clusters 1. Anorexia and anosmia, 2. Fever and cough, and 3. headache, diarrhea, and vomiting.

medRxiv preprint doi: <https://doi.org/10.1101/2022.12.14.22283379>; this version posted December 14, 2022. The copyright holder for this preprint (which was not certified by peer review) is the author/funder, who has granted medRxiv a license to display the preprint in perpetuity.

We did the network analysis with tidy verse and q graph using R (v4.1.1).

(cov-COVID-19, Fvr-Fever, Cgh-cough, Rnn-Running nose, Rsd-Respiratory distress, Srt-Sore throat, Hrv-Hoarseness of voice, Chp-Chest pain, Drr- Diarrhea, Vmt-vomiting, Anr-Anorexia, Ans: Anosmia, Hdc-Headache, Lth-Lethargy, Ach-Body ache)

Daily Covid-19 affected trend during 3 phases

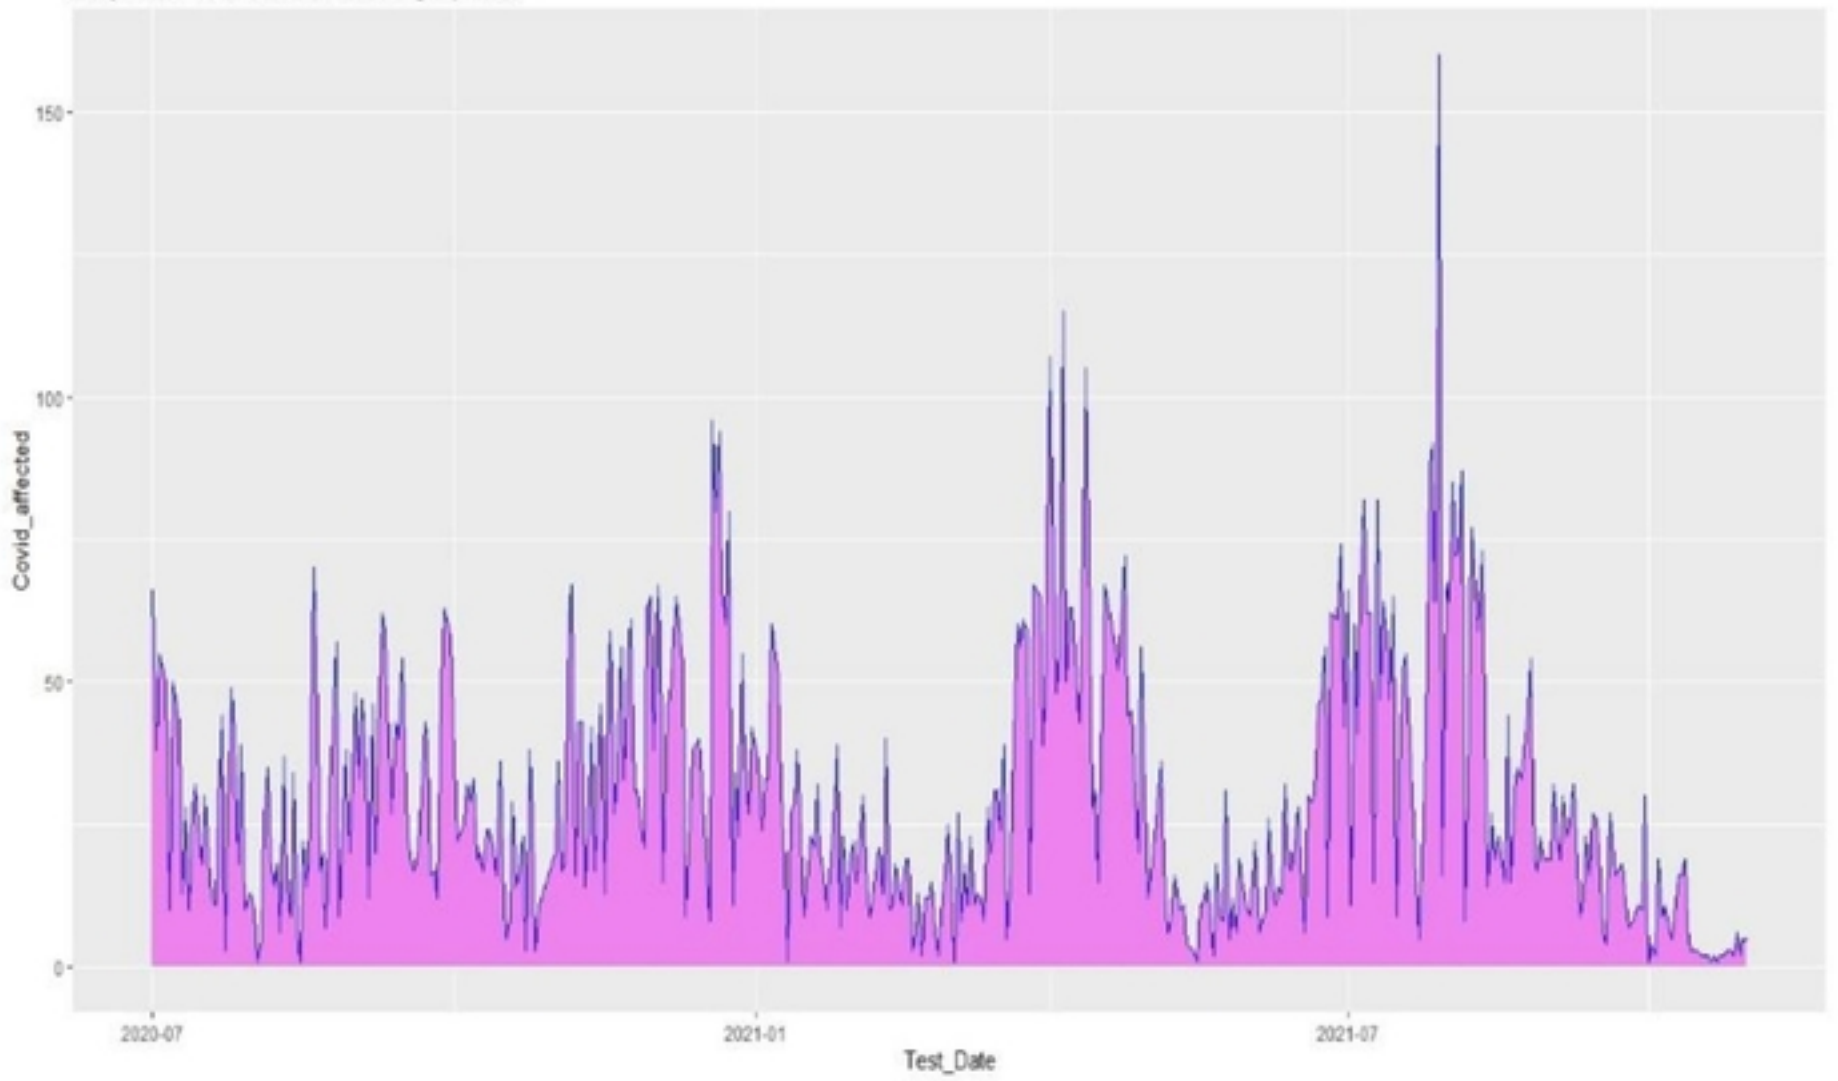

a medRxiv preprint doi: <https://doi.org/10.1101/2022.12.14.22283379>; this version posted December 14, 2022. The copyright holder for this preprint (which was not certified by peer review) is the author/funder, who has granted medRxiv a license to display the preprint in perpetuity.

It is made available under a [CC-BY 4.0 International license](https://creativecommons.org/licenses/by/4.0/).

Covid-19 patient admission trend during 3 waves

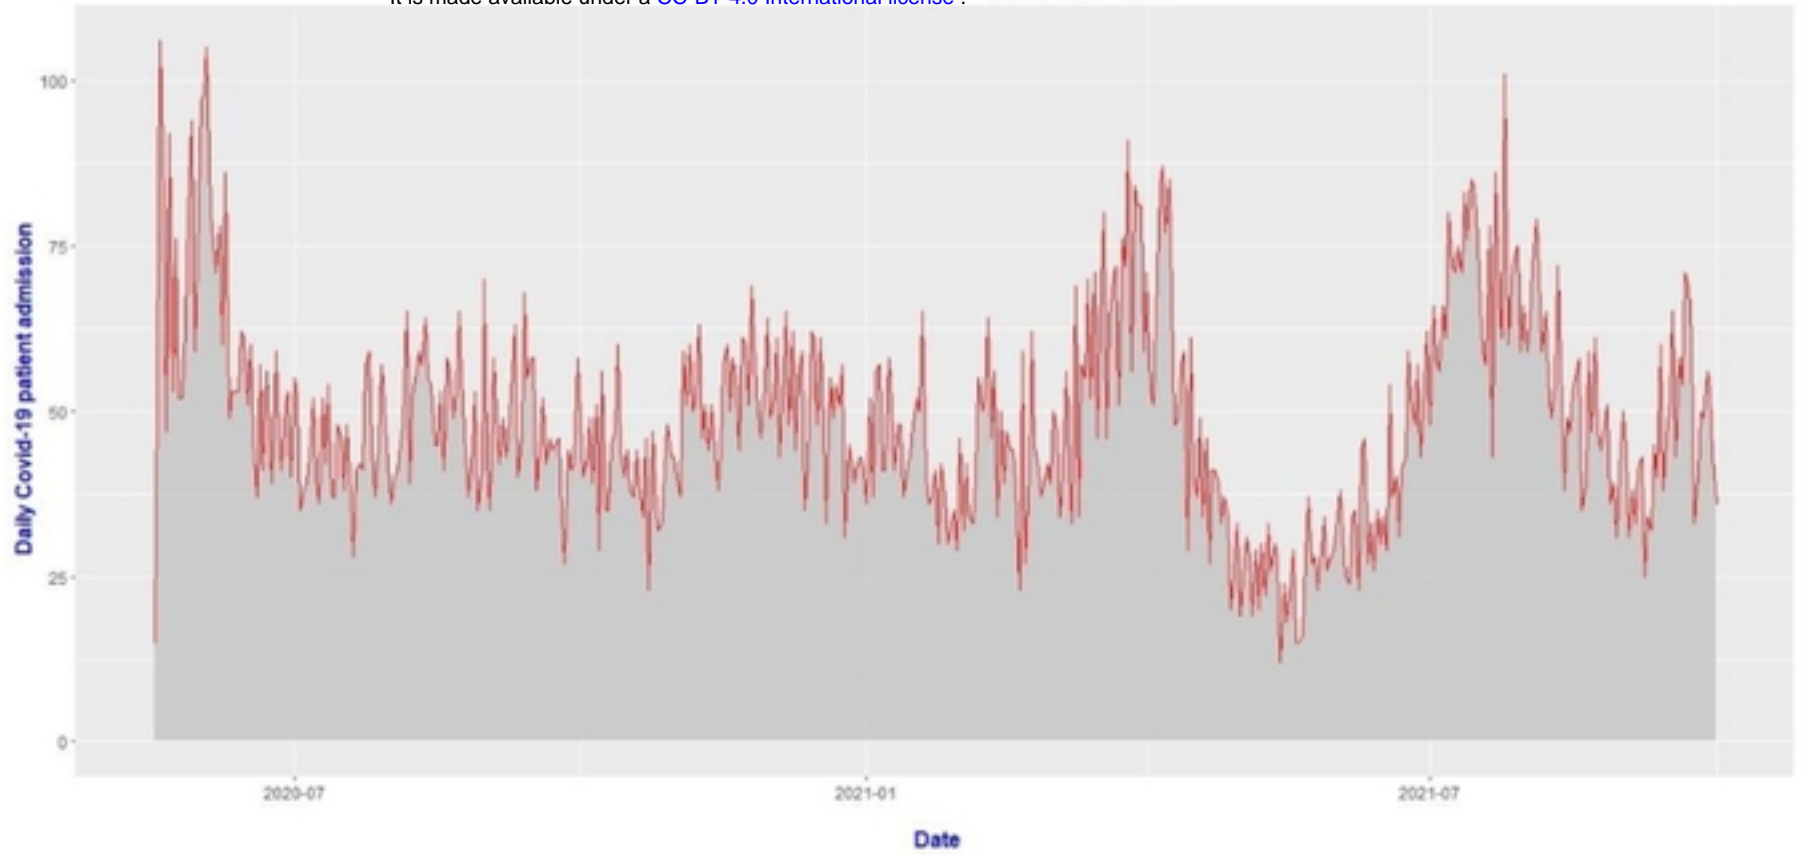

b

Daily during 3 waves of Covid-19

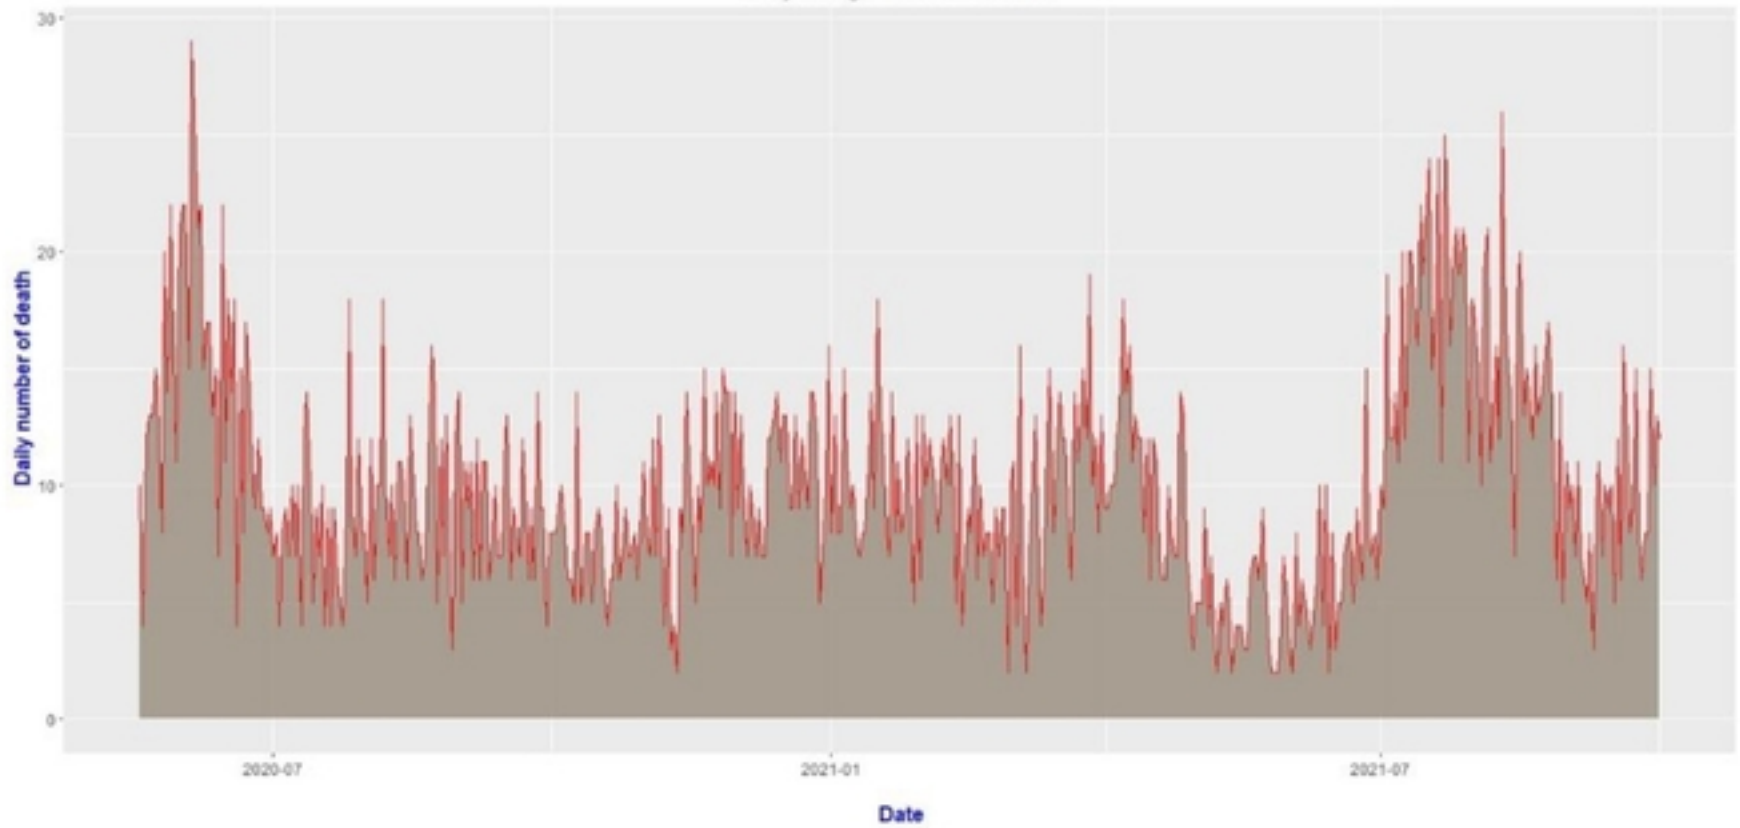

c

Figure 2

**Figure 2: Epidemiologic trend of number of test positivity, hospital admission and death in three surges**

- a. Test positivity-The first surge remained longer and the second surge was narrowest. The daily number of positive cases was high in the second and third surge.
- b. Daily admission-Number of daily admissions was highest in the initial part of the first wave and third wave
- c. Daily death-Number of daily deaths was highest in the initial part of the first wave and third wave

(The first, second, and third waves extend from April 2020 to January 2020, February 2021 to May 2021, and June 2021 to September 2021, respectively)

medRxiv preprint doi: <https://doi.org/10.1101/2022.12.14.22283379>; this version posted December 14, 2022. The copyright holder for this preprint (which was not certified by peer review) is the author/funder, who has granted medRxiv a license to display the preprint in perpetuity.

It is made available under a [CC-BY 4.0 International license](https://creativecommons.org/licenses/by/4.0/) .

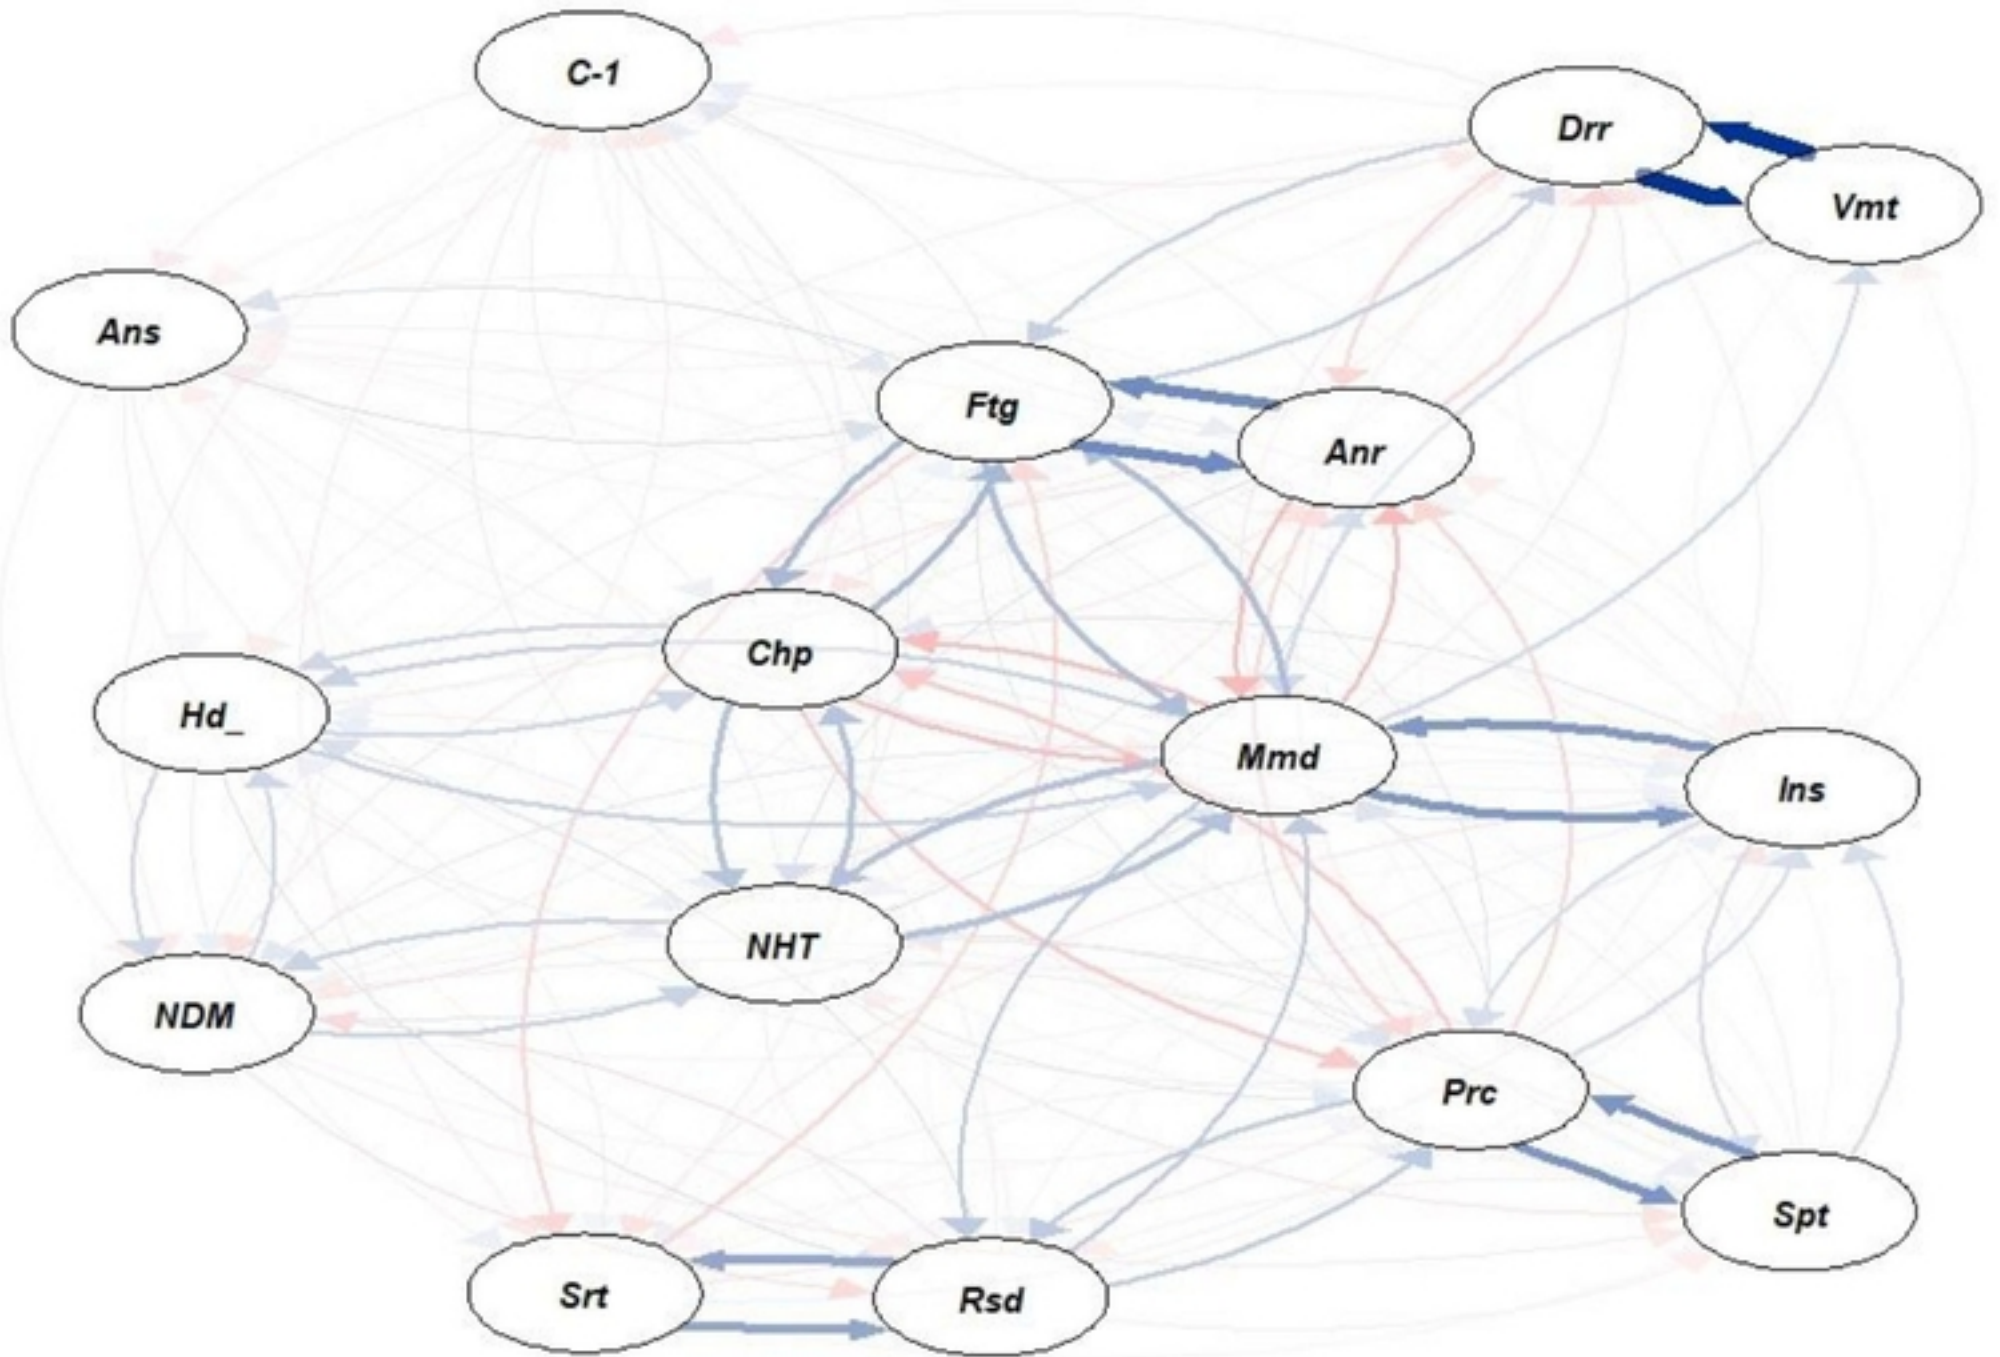

Figure 3

### **Figure 3: Symptom cluster in post COVID-state**

There were five cluster of symptoms in the post-COVID state, 1-diarrhea and vomiting, 2-fatigue and anorexia, 3-memory loss and insomnia, 4-persistent cough and sputum, 5-sore throat and respiratory distress.

We did the network analysis with tidy verse and q graph using R (v4.1.1). (cov-COVID-19, Ftg-Fatigue, Ptc- persistent cough, Spt-sputum, Rsd-Respiratory distress, Srt-Sore throat, Chp-Chest pain, Drr- Diarrhea, Vmt-vomiting, Anr-Anorexia, Ans: Anosmia, Hdc-Headache, NHT: new onset hypertension, NDM: new onset diabetes, Mmd-Memory disturbance

medRxiv preprint doi: <https://doi.org/10.1101/2022.12.14.22283379>; this version posted December 14, 2022. The copyright holder for this preprint (which was not certified by peer review) is the author/funder, who has granted medRxiv a license to display the preprint in perpetuity.

It is made available under a [CC-BY 4.0 International license](https://creativecommons.org/licenses/by/4.0/) .
